# Supplementary material for: Isolation of BAC Clones Containing Conserved Genes from Libraries of Three Distantly Related Moths: A Useful Resource for Comparative Genomics of Lepidoptera
Source: Hindawi journal article supplement (doi:10.1155/2011/165894), 2010-11-25
Supplement: f1 [file 165894.f1.xls]

## Sheet: Table S7
Table S7. STS primers used for PCR screening of the Plutella xylostella BAC library.
Accession No.	Forward primer sequence	Reverse primer sequence	Size (bp)
AB282642	GTCACCATCCTGCCTAAT	TCCTTCTCGTTCCTCTCG	ca. 420
BP938135	GCTCAGAAGAAACGAAC	CAGAGGTCTCCCACACG	ca. 380
AB180421	CATCTCACTGGGTCTCC	CGGCGGGTAATCTGTTC	ca. 500
AB180413	TTTGTTGACCTTTACTG	AATACCGTCCTTCTTAG	ca. 580
AB180410	CATCAACGACGCCTCAG	CGCACGACACGCAGTAG	ca. 380
AB189027	GGAAAGCAAGGAGATGGT	CAGCACAAAAATAAATGA	215
BP937268	CGGCTACTCCTACGACA	GCTTCCTCCCTCATCCT	ca. 280
BP937714	TCCACAGAGTCGCCTAC	GTTGATTTCGCTACCTT	ca. 500
BP937372	CGTCGTAATGAGAAGAT	CGGTGGTTGAGAAGTTG	ca. 500
AB180430	GGTGCCTGGGTATTCTCC	TGGTTTTTATTGCCTTAG	107
AB180418	TAACCTCCGTAACCACTA	GACTTCTTCCTGATTTCC	135
BP937655	TTGAATGCTGGTAAAGGA	TGCCCGTGGTGGTAATGT	151
BP937170	TCGTGGTAAGGTCAAGG	GTGGGGTTTCAATGTAG	ca. 300
AB271784	GACGGCAACTCCATCAGAC	AAAACAATCAACAGACAAA	256
AB180432	AAACCCCAGGCAATACA	TCCAAGTCCTCACGAAG	120
AB282637	TGATTGTGAAGTGGATGT	ATGGGCTGGTTTGTAGGG	379
EU366906	GCATTGGACACTAACTGG	AGACTGGGCTTGGGCTAT	171
BP937688	AAATCGCTAACACCAAC	TCTTCTTTTACCCATCC	ca. 350
BP938105	TATTGCCCCTCGTCCTG	TCTCTGAACATTGGTCT	ca. 300
BP937987	AGTTTATGTGGGCAGATT	TGGCGGAGGTTATGGTTC	473
BP937522	ACGGCTGGTATTGTTTTA	TGTAGAGGGGAGGGTGTA	375
AY529118	TGCTCTCACACCATTTG	TGCCTTTGTTTCGTCATCA	659
BP937393	GCAGCGACAGTAGGAGT	AAGATGGCGTATGAGAA	ca. 850
BP937300	TATTCAGTCACGCACAG	ATTAGGGCTCTTCTCCA	ca. 900
GQ221939	CAACCCTGCTCACAATG	CGCCCCGAATACGAATG	119
FJ613480	CGTTCACCCTGTCGTAT	GAGCCCTCCTTGTTCAC	ca. 1000
BP937420	TATCAACCAATCTCAGC	CATAGTGTCCTCCTTTC	315
AB180435	GTGGTGAAGAACTACGA	TGGAACGCTTGTGGATT	127
BP937693	CTATCCACCGTCGCTGTA	GCTTGTCGTAACCCTTGC	ca. 400
X97878	GTTCTGCCAGGGGAGTCA	TGTCATCAGTAGCCAAAG	241
AB180446	AATCCCCGTAAAGTGAC	GCCTGTTCCCTCTGTGC	ca. 780
BP937736	ATTTCGGCTGATTATTCT	CCACCACCTTACCTTCG	ca. 220
AB180670	CCTACGCCGCTATGTTG	GAGTCTTGGTCTTGTTG	ca. 560
EF417852	GGAGCGTCACAAAGAAC	GTCGTCGTACTAACAGG	217
BP937611	CGCTGGTGTTCATTGTG	GTACGCCTTCTTCTTGC	ca. 370
BP937412	ACTGGAGGGTGTTTGTC	GGCGGTCTTCGTCGTTC	ca. 470
GU947650	GTTGCCGTATGACCAGA	TGAAAATGTTGAGTGAT	197
AB180425	CTAAAACTCAGCCAAAA	TCTCCGATGAACTCCAC	114
BP937618	ACAACCCTGGCATCAAA	CGTAGCAACTTCATAAA	ca. 400
AB180448	GTTCTGAGGCGTCTATT	CAGTCTGGTGTCGTTGG	138
BP938153	TTGATGGTGTAGTGTCC	AGCGTTTCCGTTCTTGA	ca. 380
BP937512	ACTTAGCCGTTCTCCTTAT	GGTTCTTTGTATCCTTGG	156
BP937175	CAATCGCCACGGGTTCA	TCTCTTGGATGCCTGTT	95
BP937186	TGCCCATCAAAGAGTTC	CCCCAATAGCCACAAAG	137
BP938202	GGACTACACCCACTTCT	CGAGGTTATACGAGGAG	122
BP937373	GAATATCCCCATCAAGC	TCATCTCCTCCTCCATC	104
AB180412	TCAAGGAAATCAGAAAGTT	TCTACTCGGACATCAGG	ca. 640
AB180424	GCTAAGGCGTAAAAATG	CGTGGACAGGGAGATGG	101
EU818707	CCCCGTCTCCTTCAGTA	TCCACCCTTCACCGTCAC	ca. 470
BP937652	CTTGCGTCTGAAACACA	GCCACTGAAGGTATGAA	137
AB180672	AGCCCAACTCTGCCATCC	CTTCGTCGTTCTCTTCAA	117
BP937374	CCTGTCCCGCTTTGTCC	TGAACTGGTTGATTGGT	101
BP937216	AAAATGAAACCTCTGATG	GGCACCACACCACTCCAC	175
BP937640	AAGAGGCGTCGTGAAGGA	GGTATTTGGGGGTGTTGT	ca. 330
BP937151	AATACCTCCCCCACTCC	ACTTCTTTCCGTTGTTG	120
AB180407	CGGTTCGGTTTTCGTTT	CTTGTAGGGGTCTCTGA	ca. 260
AB180415	ACTACCTTTTGCCTTTGG	CGCTTCTTGTTGATGAT	ca. 740
AB180436	CGTGCTTGTTCTCTTGC	AACGGCGACATCATCAT	126
BP937236	GCTGGGTCCTGGTCTGA	TCTGGAACTTGATGGTG	146
BP938171	GGCAAGAAGAACCCTAAG	TGGAGCAGCACAATACGC	101
AB263117	CCGTGCTCTCCGTCATTA	CTCGTTGGTCTCCTTGTC	ca. 1.8kb
AB180444	GTTTACGGCATTACACG	ATCTTCTCCACATCAGC	ca. 900
GU321345	GGGGCAAAGAAAACAACC	ACAAAACCAGCAAACAAG	376
BP937221	GGGTTGACAGTTCCATT	GCCATAGTAGCGAGCAG	141
AB180429	AAATGAGTGAAGGAACG	GAAACCAAAGACGAAGA	ca. 300
BP937752	TCGGCATCACAGTTCTC	AGGCTCGTACAGTTTTG	153
BP937392	ATAAAGGATGAACAAAGGA	TCTAAGAACTGCCCGATGA	101
EU163980	CGTCACCCTCGGCTTCG	CTTGTGCGTGTTGTCAT	ca. 580
EU754719	AGTTGTCTGTGGTCTGA	GCTCTTGATGTAGTCGT	ca. 500
AB263118	GTTGATGTGTGCGTTGA	CGTAGTCGTCCTTCCAG	ca. 340
AB282640	GGACTTTGAGGACATTT	GAGACCACCACGGACTG	ca. 460
EF186792	TCATCAACCACGAGCAG	TTACACCAGCCAGCAAC	125
AB180451	CAGGGAGCGAGATGAGAT	TTGATACCACGGATACGG	ca. 500
AB180426	CACCAGATTCCCCTTGT	AGCCTTGCCGTCCTTGT	ca. 640/680
AB180420	ACCAACTCTGACCTGAA	CGCCGATGAAAACAACG	ca. 700/900
AB180423	TGCCACCCACTTGATGA	AGACCGTTGATGTTGTT	192
BP937875	GTGGAAACGACAAACAG	GAGCCAACACAGACAGG	ca. 570
AB265177	CTCCTGTATCCCCTTCT	CCGCTATTTTGTTGGTC	253
AB189025	AGACCGTCAAGAAACTA	TGTGTGCTGCTGCTGTG	ca. 670
BP937794	GGACCTCAACCAGAACC	ATTTAGCAGCGACTTAT	209
AB180419	CAAAGCCATCAAAATCC	GCCCTCTTCTCATACTG	ca. 900
AB180422	GAAATGACGAAGGGAACT	GTAACCACACTGAGCACA	120
AB189029	AGGACAAGACCGTGAAGG	GTCGTTGGGCAGAATGAT	ca. 620
BP937967	GGCACCATCACAACCAAA	TTCGGGGAAGTCTATCGT	ca. 520
AB189024	ACAGGAGAGCACAGCAT	CTACACCAAGCAGTTAC	ca. 600
AB180445	TTCCACAACAGCACCATC	AGGCGTACAATAAAACTA	117
BP937184	TCACCATCCCCCTGCTC	GCTGCTTCTCCACCTTG	ca. 600/660
BP937448	TCGGAACAGAACCTCATC	TCATCAACAGCCTCGTAA	143
BP937174	CAAGAAGGACAAGAAGC	GGAAGCCGTCATACTCG	104
AB180441	GCGTAACTGGCGTAAAC	TCTTGGCTGAACCGTAA	ca. 860
BP937659	ATTACGCAACAGCAACAAC	CATCAGCCAACTCCAAAGC	159
BP938018	TGGAAACTTTGGATGTGG	CTTTGCTTTTGCTTGAG	134
BP938159	AAAGAAGTGCCCCAATA	CTCGTGTAGATGACCTG	ca. 580
AB180417	GCGAAAATAAATAACCA	TACTTGCGGATGAGACC	ca. 240
EU137131	GTGGCTATTGTTGTTCT	CGGCGAGCAGGTTCTTG	214
BP937745	GACCATTCCTTCTCGTG	GCCGCCAGTTCCATCAA	142
CS677798	CGTCGCTATCTCGTCTC	CACCACCGCCTTCATCG	ca. 600
AB325801	AGTGAAGAAGTTTAGTGG	CCGCTCCGTGTCCGTGAA	205
AB214972	TACAAAAAGCGAAGTCAA	CTGGAAGGCGAAGGTCTC	203
AB282645	GAAAAGATGACCCAGAT	CGTAACCTTCGTAGATG	160
BP937293	TGGAGGGAGAACAACTT	TCAGGCACCATCAGAAT	275

## Sheet: Table S6
Table S6. STS primers used for PCR screening of the Ostrinia nubilalis BAC library.
Accession No.	Forward primer sequence	Reverse primer sequence	Size (bp)
EU532458*	TGAAATCCCGGAACCAGTAACA	TTGAGGTGAGTAGTGAAAATAGGAG	ca. 1300
FS438566	AGGTGGTCTCTGGGTTAGC	CGGATTATAGGTGGTCTTA	ca. 2kb
DQ204988	AGGCAGACCAAGGCACTCTTGCC	TTCGGTACCGATGGCCCATACAG	ca. 360
AB568488	GCAGAACAAGCTAGCCGAACTC	CGCGCAGTGCCGCTGGTACA	563
EU532460*	GGCTCCGGCACCAACCTGGACTC	CGTAGGCGCTCTTCACCACCATCTCA	ca. 600
FS438625	GATGATGAGGATGAGCAG	AGGTGGAGGTGGTAGACG	ca. 1.2kb
EL929597	GGTGCCGTCATCAACTGC	TGCCCTTCTTTACTGTGG	ca. 480
EL928855	CAAATCTGGCAAAGTGA	TAAAGTATGGCGTCTCG	152
EL928410	TCGTCTATGCTCTCACTGTA	GTTGTTCTTCTGTCGTATGT	182
FS438431, FS438432	ACAGCGACTTACATTCAG	ATCTTCTTGGGTTTCTTG	ca. 950
FS438633	AATGGCTGGGTTACGCAAAT	CGGAGATGAAGTGGGAGTGA	ca. 460
FS438571	TCGTCTATGCTCTCACTGTA	GTTGTTCTTCTGTCGTATGT	238
EL928651	GACTTGTTCTACTACGC	GTGTCAATACGCTGGAG	125
EL929153	GGTGCTAAGGCTGAAGAA	TAGAGGGGTCGTATTTGA	ca. 760
FS438439	CGGGGGCTTTTTGTTGTGT	TTCCATCTTCTTGACCATT	ca. 380
EL928554	CGCTAAGAACCCATCAG	ACTCCTCGCCGTCAATA	104
GH987771	ATAACTGCTAACTTTGCT	AGGAACATTGACTGCTTG	ca. 300
FS438402	CCGTACTGAAATGAACAA	GTGATGACTCGCTCCTTA	ca. 300
EU376026/O. furnacalis	TCTATTCTTCGTTTGGAT	ATTTCTTCGGTGGTCTAA	ca. 330
FS438389	CACCATTATGTCCAACC	TTCTTCAACCTTTCCAA	144
FS438638	CAAGCCGCATCCGTAGTG	CCAGAATCCGCAAAGTAAT	248
EL929141	AAAAAGTCAAAGGAAAGG	ACTCAAGACGCAGCACAA	ca. 2kb
GH996474	CACTGGAAAAGATGTCG	TGTTGAGTCGTTGATGG	ca. 250
EL930010	GGAAGCAACAGACAGTG	AACATCATAGCCGACAA	116
EL929967	GTCAGTGCAGTGGTTCCT	GGTGTTGGCGATTTCATTG	ca. 330
EL928535	GACACACTGAACGAAGACT	ATAAAACACCGATGAGAAC	180
FS438603, FS438604	ATTACAAGACCCGACAGT	CAGCAATCCACAGCACAT	134
AF173392	CGCTAACCTGACCACTGAA	AACCACGACGCAACTCCTT	125
EL929657	GACCCAAAAATCATCAAAGC	TGCCGAGTTCAGTTAGTGTG	166
FS438661	GTGGACACGCAGACGAT	ATGGATGTGGAGGAACC	106
EL929861	GCCCATCACTCCTAACAG	GCTTTTTCGTCATTTCTT	470
FS438416, FS438417	GCGATGTTATGCGATTC	TTGGGCTTTCCGTAGGTG	ca. 300
FS438670	AGCAACAGACCATCAAGA	TAAGCCATCGCCTAAGCA	269
AB568279	GGCGGCAACCTGGACTA	ACAACGGTACATCAACTT	ca. 800
FS438873	CTCTTTTGTCAGTGCTTCTC	CTTTAGTCGCCATTCAGGAT	ca. 150
EL929978	GCCACATCCCAACTCATA	TCTCCTAAACGAACATCC	ca. 1.2kb
EL929659	TAAGAGGCTGTGCGTGTC	GGTGATAAGGATGGAGTT	154
AB568465	TTTTTGCTTATGGACAGA	GAGGGCTCGGGGGATTAT	ca. 600
U04223-U04226	CGCAATCATCAACCACAT	CCAGCCGTAGGGAACAGC	106
EL929414	GCGTTGGGTCGTGTATGC	CGTAGAAACCGCCTTGC	ca. 530
FS438656,FS438657	ATGTCCGAGGCTTTCTTC	TGTTGTTCTCTGTGTTGA	181
EL928394	GTCAGCGAATACAACAATA	AAACTCATCCCCCATAGCC	ca. 500
EL929964	CATCGTGCCCATAAAAGAAT	ACTCCTCGTCGGTGCTACAT	122
EU532439	ATGGGTTAAGTGGTTGGATG	AATGATTTTGAGTGTAGGTGTC	ca. 320
EL928586	GCCCACGGTCTTTGCTGA	CGAACTTGAGGATGCTTT	ca. 400
EL928482	CACTTCTCGCCCATTCCA	CATAGGTTCTCATTTCCA	ca. 400
FS438967	CCCAGCAGCAAAACATACA	TGAGGTCTTCTTCCGTGAT	ca. 1.6kb
EL929443	CTCTTTCGGTCGCTACTC	AAATCATCTTCTGTCCTC	ca. 1.3kb
DQ097777	TATCGGGTACGCAGTGGTC	AAGTGAAGGGAGTGGTTG	ca. 540
AB568290	CGAGAAATGTCAATGGAA	ACTGGGTAACGAAAGGTA	ca. 1kb
EL929324	TCTGCTGGTGTCTATGTGGA	TCTTTGATTTGTGTTTTTGC	126
AB568281	CGCCTTCTTTTTACCATCG	AGTTCCCATTGACCTCTGA	ca. 1.2kb
FS438671	CTGCTGCTGGCGATGTGC	TTTGAGGAGGGATTCTGC	101
EL928550	GCCACTACCTACAGCAG	TATCCTTATTCGTTTCGT	171
FS438626	CACAACAACTCCGACTCA	CAGCCTGCCACTACTACG	ca. 1.1kb
FS438397, FS438398	GTATTCTTTGGTTTTAGC	CATCTTTGACGGTTTCTT	ca. 1kb
FS438457, FS438458	CACGGCAAACTCAACGA	CAACGAAGGTCCAGAAG	148
AB568282	GACAACCCTAACATACCG	TGCCTCCCACTTCACAGC	ca. 1.3kb
EL928699	CGTCGTCGTCGGCACAGT	AGATTTCTCCTCCAGCAG	122
EL929485	GGCATAGTGGCGTTTAG	CATTCGTCCTGTGGTCA	90
EL928390	CCTGTCATCTTCTGCTG	CGTCAAAACCTTCTTCG	ca. 600
EL930062	CCTATCATCGGCGTCCTG	TGTAGTATCCTCGGTCTTT	ca. 580/630
FS438414, FS438415	TTTTCGTAGGTCTTTTCC	AGCCCATTTCTCATTCAGTT	ca. 550
AB568464	GGACCCAAGGAGAGGAC	CAGCAACCAACAGCATA	246
AB568283	ATGGCTTCAGGGCTTGGT	ACTCTTCGCACTACTTTT	386
EL929785	TCTGACATTCTGGAGTTC	TATGTTTTTCGGATTTAT	ca. 1.3kb
FS438620	TGTTTATGGGACGAGATT	ATGCCTACGCTGACTTTA	312
EL929323	AGCGGTGCCTTTGGTATT	CATTGACGGTGACAGTGC	ca. 380
AF243047	CCCCGTAGAAACCAAAGT	AATAAATGCCCAAAAGAT	503
EL928959	GCACCAACCAGCCCTACC	CACCAATGATACCAGCAA	ca. 480
FS438608	CAGGTTGATAAAGCAGCAGATG	GCGGATATGACAGTAATGAAGT	280
AB568463	TACTTGTTCTCCCTTCC	TGTCCGTTGTTGTCTCC	164
FS438579	AGGCGATAAGAAAAGATT	TGTGATGCTGAGATAGGT	ca. 1.2kb
FS438624	ATACGCAGCCGAGGAGAGA	CTGAGCAGTTGGTGGAGTC	ca. 520
EL929854	CATACAGCCCCTCATCAG	CTAACCAGCCAGTCTTGC	ca. 660
FS438427	GCCACAGACAACAAGGT	CGCAGACAATACACAAG	ca. 680
FS438386	GCCCCGTTTGCTCCAGTA	TGACCCCCACCCTTGACG	ca. 1.2kb
EL928599	TGCGTCACCGATGGATT	CGTTTTTGTTCAGTTCT	507
FS438494	TACATCCTGACCATCCA	GTTGACGGCGAGTTGAGC	ca. 780
DQ988989, AY513653	GGTTGGTTATGTTTTATTT	GTTCTTGCCTTGCTGGTC	610
EL928744	TGACTGCTGGGATGCTGA	TCCTTTTTGAACTCTTTGC	206
EL929706	GAGAAGCGGATGAAAAAC	GTGTCTGCGTGAACTGGT	ca. 580
EL928745	AGATTCCGCAAGGCTCAA	TTCTCACCAGTCAACAAG	143
EL928885	ACCTCCGTGACCCCTACAA	CACCCATCTTCTCTTCCAA	413
EL929880	AGGACCAGAGACAGCAAAGT	AACGCACCAAGCACCCAAAA	110
EL929792	CCCCCTACTTTCTCATACAA	TAACTCACTGCTGCTCTCCA	282
GQ844877	GAGACCCTGACTGAACCA	CCAGGAGCAGAACATCAC	560
EL929838	CCAGCCCTCCGTCTACTA	TCAGCCTCTTCTCATCA	ca. 800
EL929540	AATACCCCAGCGGAGTG	CAGTCATAGCCAGTGTG	ca. 380
EL929643	GTCTCCAGCCATTCAACA	TTTCTCCGCCTTCTCCTT	ca. 590
AY821557	GGGGAAGAAGCCGAGTGT	TTTATGGTGTTGTTGTAG	327
EL929942	CTCGCAGGAACAAGACT	AATAGCATAGAAGAAGG	ca. 480
FS438513-FS438515	CGAGACCTTCAACACACC	GAGTCCAGCACGATACCG	93
FS438578	GACTCAAAAACACCCAAAT	ACAACAAATCCGCATACAC	183
FS438418, FS438419	AGGGAGTCAAGGGTGGTA	TGATTGCCGAGGTTATTT	175
FS438394, FS438395	GTCTTCGTTTTCGGATTCAA	TAGGTCTCTTTTTCTCGTAT	124
AB568274	ACAGCGTGCCGTCCTCAAAT	CAGTCAGTGGTTCCTTAGTT	397
AB568280	TGGAGTCTATCGCCTTATCG	ACAATTCTTGAGCACATC	197
AB568288	CAACCTTGATGAACTATTT	ATTTTATCTGCTCCACACG	ca. 1.5kb
FS438391	CGGCTGTCAACTGTAGA	AGGGGAGCGGATGTAGA	ca. 380
EL929459	ATGAGGAGGTCGGAATC	GTGAGCAGCAATAGGTG	174
EL929887	GAGTTGTCGGTGGAGTTG	CGGAGATGTTGAAGAAGC	ca. 600
DQ157184	TTAGCGAGCATAGGGTCCAA	CAACACAATACGAAGAGAAA	285
AF133631	GGACTTCTACAACTTCTGG	TAAACTTCGGCTAACACCT	588
EL929195	TTTGAAGAAGATGATACG	AAAGTTGTGTCCCAGAAT	ca. 570
FS438607	CGAACCATACGAATAACTG	ATCAACCTCAACATCATCC	242
FS438482	GATACTTGTGACTTACGG	AGTCTTCTGTTCCCTACG	ca. 950
FS438484	TGAAAACCATCGTAGCAC	GCCGTAGTTCTTGAGCAG	134
AB568284	TCTCAGGCTGCTTCTTGGA	CAGGGTCATACTTCTTTTT	ca. 1.8kb
FS438648	GCTATGCGGGCTCGTATTG	CATCGTGGTGGTTCTCTCC	ca. 210
FS438634	GAGATGAACAAGATGGT	GCTGATTTCCGATACAC	ca. 2.2kb
DQ097796	GGACAGTACAACCGACAAGG	GACCATCACCGCACAAAATC	ca. 380
FS438653	GACGCTGACGACGAGGAC	CCGCTGCTTTGACTTGAA	ca. 480
EL929388	ATCCACCGCATCCGTAT	ACCTCCACCTCTACTCC	ca. 1.5kb
EL928438	AATGGGTCGTTACTCTCG	GAAGCGGCGGAAAGGAAT	ca. 430
EL928874	CAGACTTGGAGATTGAG	CGCACTGGTAGAACACG	102
FS438382	CTCCATTGTCGGTATCTA	GTGCTTGACGGGCTTGT	ca. 860
FS438483	CAACGACAAGCGATTCA	TAGCACCAGGGGAGCAA	ca. 390
EL929444	CGGAAGTGGAGGCTGACC	ACGGCTGTTTGTAAGGAC	116
AB568285	GCCAGCAACGGAACCATC	CAGCACCACAAAATCTTA	148
EL929499	GACCTCACGCTCAACAA	TCAATCTGCTGGACCTT	122
FS438436	GCCACAAAACAACTAAAATA	ACACCTTCAGCAACTCCATA	ca. 760
EL929341	AAAATGACGAAAGGAACG	AGGGTAGCCACACTGAGC	123
FS438527	ATGATGGAGGAGAAGTTGA	AAGAGTTACAGCAGTGACA	261
GH995651	GTCCCAACAGCATCATC	TCCTTCACCATTCCAAA	326
EL929165	ACTTGCTAGGACTTATGG	TCTAGGTTCTGTTTCTGG	154
FS438614	ACATACCGCCAGCCTCCAAC	CATTTTCCCAGTCCTTTAGA	216
FS438619	GTGGACCGAAGCAAGAAGAT	ACTAATGGGCAAAATGAGGA	102
FS438672	TACGAGGTGAAGATAGTCC	ACGGTGGTGGCATAGTTGA	ca. 650
FS438399	AAAGTGGAGAAACAGCAAAA	CCTACGAGTTGGAGTTGGGT	ca. 500
EL929158	CCAAGCCAGAGAACAAACT	GACCATACTGCCCAAGGAT	ca. 440
AB568289	GTGTCCAGCGTCAAGATG	GGTGTCCAAGTAGGTGTA	390
FS438533	GAGCATCCGCACCGTCATCC	AAGGTGGTAGTCGTTGAA	ca. 600
EL928585	GAAACTGCCTGTCCAAGA	CGCCGTGTCGTAGAATCC	122
FS438567, FS438568	ATCAGCAGCATCAATCAT	TATACAGAGAACGCAACG	201
EL928863	CAATCGTCAAAAAGAGGA	TGAACCGTAACCAATGT	ca. 1.2kb
GH992608	AAAATAGTCCTCCATCTTG	TAGCATTAACACCACCTG	ca. 320
EL929251	TTGGACTATTATGGATTGC	CACCTGTTATTTTCTTCAC	382
EL928892	ATGGCTGGCTTACTTCG	GACAATCACGGGTTTTC	ca. 470
EL929152	ATTCCCCAAGAGCAAGTT	CATAGAGCAGACCAGACC	121
FS438659, FS438660	CTGGTATGCGGCTAAGTTT	TACGGGTCTATTCTGTCCT	ca. 450
FS438455, FS438456	GGGCTAAAGATGAACCAGA	AGTAGTACCACAGGCAGTC	155
FS438445	AGAAAGTCGGTAGAAACG	AATTGCTTGCCAGTGTCA	166
AB568467	TTCGTTTCCCGCTCGTT	GTCTGATACTTTCTTCG	123
EU532466, EU532467	AATCGGACGCATAGTAAT	ATCGGTATATCTCTTGGTA	372
EL929806	CGAAGCACAATGACGAC	GGGTAACCGATGAACTG	196
AB568468	GAGAAAAAGGACGAACAT	CCGAAGACAAGCGAGATT	103
FS438628	GACCTGGAGAAAGAGAATC	GGCTACTAAGAACACTACA	ca. 440
AB568286	CATCGCTGCCTACAACTG	TCGCTTTTCCTGACCATC	122
EL929874	CCCGTTCACTGGCAATGT	GATGGTCACGATGTCTCC	ca. 700
FS438650	CCCAACCAACTACCAAATCC	ATCCTCCACTTCATCTCCTT	208
* Coates et al. Genome 52: 57–67 (2009)

## Sheet: Table S5
Table S5. STS primers used for PCR screening of the Heliothis virescens BAC library.
Accession No.	Forward primer sequence	Reverse primer sequence	Size (bp)
EY121444	TGGTGAGAAACGCAAAC	ATCAAAGTGGAGAGTGG	97
EY122537	GCATACGACTTCCAGAC	GAGCCAGTAGGTGACAA	120
AJ748328	CAAGAGGGATGTTCAGAGAT	GAGATGGTATGTCAAGAGTC	230
EY122479	CATCCTCATCCACGGTAACG	CTTTTTCCCCTTCTTGTAAC	140
EY118373	TCCGCCTTCCTCTACAAC	GCTATGACGCAAATCTGG	ca. 180
U23080	GGCAAAACTGAGGAGGTAG	CAGGGAAGCGTGGACATCT	460
EY122607	TTCTGCCACCGCTCTCT	CAATAAGTTCGTAGTCG	91
EY118432	ATTGTCCCTCGGTTTGA	CAGCATCTCCTCCTTCG	ca. 570
GR960922	CGAAGTTCCGCATCTCC	GCACAGCAATCACATAC	ca. 660
EY117762	ATGGCAACAGGATTCTC	AACCGATTGTAGGATTA	ca. 1200
EY118281	GTGAAGAGGAAAGACAGATT	GACCACAAAGCCAGGAGTAT	320
EY117971	TCCAAGCTCCCCAACAT	AGTAGGAAGCGATAAGA	150
AY898641	ATACTATCCGACAAATCTGC	TCCATACCTCCAACGAAACC	335
AY172682	GCAGGGTTACTCTTCAGGTC	TTCTTGGATTTCATTTACGA	106
EY117468	TTTACTGTGTGGGATGTCG	TGCTATTCTCTTTGTGTCG	117
EY121947	ATGTTGGGAAAGAGAATGC	TTGTTGTAAGGCGAAATGC	101
EY120107	AAAGGACTTCGGTGGTTC	TGAGAGATTTGTTGTTGA	167
EY120960	AGGATGAGGACAACGAGT	AGCAGGCAACACAGTATG	ca. 700
AF368031	TGACCAGAGACGAGACTAA	CCCAAGAGCCAGACAGAGC	117
AX383958	CTGTGCCTGGACGAGTA	TCTTGAGTGAAATGGAA	103
EY118472	AAGCAGCGTCAAAAGAAAGC	CACAGAGTCAATGGGAATGG	117
EY121736	CAATACAAAATCCCAGACT	CCTTTCCAAATCCTCACGA	114
U71428	ATCCGCTTTCATCTGTCC	ATCCCTGTTGGTCGTGTT	191
EY119524	CGAGTTCCAGACACAGA	ATGACGCCGCAGTTGAT	99
EY121155	TACCGTCTGAAGTTGGCTAC	CCGTCCTCGTGTTTTGATGG	134
AJ487483	TGGTTTGGGCAGAGGATTA	ATAGAGAGGGGCTTGTGAG	ca. 500
EY122445	GTCGTGTGTTGTGTGGAAA	TGGTGATTGTCGCTGCTCT	160
U20135	CGATTTCACAGCACAGGT	GACTTGATGGACTTAGGG	174
EY120057	TGGTGGGTATCCGTCAGA	AGTAGTTGGTGCCTTTGG	105
EY122012	GGTCACCTGGAAGATAG	TCGCAGTAGGCATTAGT	107
EY122615	GCGGAATTAAGAAACGAG	TGGAGGGAGCGAGCAACT	109
EY118827	ACCAACACTCTTCAGCAA	AACATTTCCTCACTCACG	140
EY122740	AAACCTGCCAAAACTACTGA	AACATACAATCGTCGTCCTC	260
EY120102	ATTCTATGGTCCTGCTCA	CACGCCTTGTTGTCCTGT	202
EY121457	AAATCATCACTTAGCCAAAT	GGGGGTCCATACTTCCTCAA	148
EY118679	TGGTGCCGTCGTTGGAG	CTGGTATTGAGGTTTTC	157
EY119006	TTACGACGGTGGTTATGGAC	TTGTGGTTCTGCTTGATGAT	170
EY122359	TCCACAACCAAGCATTCCAT	AACCACAGACAAGGCAGAGA	272
EY117583	CAGAATCACAGCAAAAATG	TCAATCCACAGTCCTACGG	210
EY122604	CTCCCGACAGAACATCC	CTTACCGAAGCCACAGT	133
EY122614	CCGTCAAGTTCCTCAAA	GTCGTGGGTTCGTTAGC	115
EY119520	CCTGTTTGGGTGGCTCTC	TATTGGGCTACTTCTTCA	160
EY122587	ATCGAATGGCACACAAG	GGCGAAGGATGGAGAAT	94
EY122142	AGGAGCAGGGCAGCAACC	GCAGCAGCATTCTTACAG	182
EY118329	GAAGGCGGAAAGGGCTGGAC	CTGTATATGGACGGGTAAAT	205
EY118218	AAGAAGGATTACTCAAACG	CAGGACAACGGAACCAGAT	ca. 310
EY122398	GTTCTCATACGCCATCTTG	CTTATACACATCAGTCCAT	250
FJ561484	ACCCGAATGCCGTGACC	ACCTGCTTGATGTTGAA	103
EY120247	GTCGGCAACCTTTCCAA	CATCGGCTCGTCTGTCG	ca. 420
EY119514	GATTCTAAGCCCTCCTCCAC	GTCCACACATTTTCGTTTCG	114
EY119041	GATGTAATAGGCGAGAA	TAAGATGTTAGGGTTTT	111
EY122685	CCTAACGAGCCTACGACAG	CTCCATCTTCAATAACGAC	155
EY119749	CGCACCTACAACTTCAG	CCCAACCAATAACGATA	187
EY120072	CACAGTTCATCACAGACG	CCGAGGCAGAGCACAAGG	115
EY119503	AGAACCAGGGCATTGAC	GAGCGTGTGATAAGGAT	118
EY122388	AATCAGTTCAGCGGACAAT	TTCACTTTCTTCTTCTACG	ca. 660
EY120921	TCATCATCAGAGCAGAACT	GCCCAGGACAGACGAGAGC	114
EY118394	GAGGCGGTTTTATGGAA	ACTTGTCGGCGTAGCAG	ca. 460
EY119798	AGAGCGTATTGGTGAGG	TAAGTTGGTTGGAGAGC	ca. 400
EY120714	TGCCATCTGGTGCTTCC	CTCTTTCTGCTGTGTGA	164
EY121815	AGGTTTCTGCTTCGTCT	GCTTTATGGAGTAGTCG	113
EY122015	GATTTTCCCATTCCTTG	CCATTTGTAGCCTTCTG	150
EY118088	CATACAAGGGAGAAGACAA	ACGCAATCGCAGCAGAAGT	231
EY122126	GCGGAACAACTACAACGAG	TGCCAAACAGGGTCAATAC	114
EY118427	CATGGACAAGATTCACC	GCCGACTGCTGCCTACA	127
EY117439	TGAAGAAAGGCGACACC	TGGCAGATGACAGAGAT	157
EY121802	GAAGCATCCGCCAGAGA	AATTGTTCACCGAGACG	130
EY120451	GGACACTCACGCCACTG	CTTCCTGCACCTCATCG	ca. 570
EY122571	AAGAAGAGCAGACCAA	AGGCTTCATGTTACGC	104
AX247467	GACCAATGCCAAGATG	AGTTCCAGATGTAGCC	122
EY122195	TCGTCGGTGGTCTGTCAT	ACTCGCTGTTCTTCATCA	102
EY122101	GTGGGCTATGGACCTGAAG	TGGACTGTGAGACCGATGA	104
EY119746	ATGCCCCAGAAGAGAAAG	TTGATGAACACCACCACA	ca. 400
EY121141	TCTGGGTGGGGTGTATGTTG	GACGGAGGTTTGTATTTTTG	128
Y09009	GAAACGGAAAGAGAAAAAGG	GGGGCGGAGGGTCACATTGC	107
EY120912	ATCTCAATCAACGACTCTG	CCACATAGCACACAAATAC	134
EY117879	CTTTGATTGGACGAGTGG	CCTGGCTTTTGGTTAGTA	99
EY118706	TGCTCCCGCTCGTTCC	ACAATAGCCCTCAAAG	128
EY121202	CGTAGCGGCTCAAACTTCG	TCTCCACTTCACTCGTCAA	110
EY117442	GGGGATGATGGCAAGTGGAC	TCAAAGTAGCAGATGGAAAT	137
EY119508	TTGAAGGGAAAGTTAGT	TAGTCGGTCATCTGTGC	263
EY120701	GCTCCCATCTACGACAA	TTCACCTGGTTATCCTT	149
EY121096	TCCGATAAGCAACAACGATG	CTATTAGCAGACACCACGAC	141
EY120156	AGGGTGGTGGCATCGTC	TTAGTTTTGGGGTTCAG	124
EY118212	TCTTGGAACACCCTCACAT	TATCTTGCGAACCTTACTA	304
U50551	GGTGTGCCTGGTTGAAAA	GGGTGCTGGTGTTGCTAC	128
EY119581	GCTGGTTGAAATGTTGGTC	GTTGTTCCTATCGCCTCTC	160
EY122451	GGGTATGCAACAAATGG	GTGGGATCTGGCGAATG	96
EY121812	TACGCCCATTTCCCCATCAA	GTGCCATCTTTACCCTCCTG	103
EY118360	AGCACATCAAGCACTCC	ATAGCACTGGTTTCTCA	168
EY120868	GAACACGAAGTCAAAGA	GGGAGCCAACAAAGAGG	151
AJ298149	CGGCTTCATGGAGTAGGC	TTTGTTTAGGCGAGTATC	117
EY118320	ACCGTTGAAATGGCTGACA	AAACCTCTCCCTGATGCTG	102
EY119744	AGAGCAGGTAGCAGAGAC	ATCGGGCATCAACTTCCA	101
EY118996	TGACAACAACGGACATA	GTAACCTCTGCGGACTG	115
EY122120	CCAGTATGACAGTGACG	GCCCGAGATAGAAATGC	217
EY122734	ATCTGCTTGTTAGTTGC	CGGGGTTGCTCTCATTC	184
GR966201	CGTCAAAGAAGGAAATC	CCGAGGACAGCAATACA	179
GR969506	TTCTGATGCTATTATTGGA	GCTGCTGTTGCCGATGTAT	ca. 200
EY120179	GAAGTCCCTACACCACACG	GAACACGAAGCCTACATTT	ca. 580
EY122260	ATAGCGTTGATGTGGTGTA	AGGCAGCAGGTAGTGAGAC	131
EY117460	TCAGCTACGGCGGATGG	TTGTTGAAGTGGTTGTT	148
EY118631	CTCCGCCGCTAAAGATTC	TGTCACCTCCTCCAGTAA	143
EY121701	TGAGCAATGACAACAAGC	ACGAGCCTCCACCAAAGA	100
EY118476	CGACGCTAACGGTATCTT	CCTCTTGTCCTCATCTGC	154
EY122758	TGTGTACCGAAAGAATGAAT	ATAGAAAGAACCGACTGTGC	469
EY122768	AACTGGAATGATGATAACG	CAACGATGGGGCACTGAGC	241
EY119801	ACTATGCTGCTGCCTACTGT	CCATTGTCTACGGGTTCTAC	133
EY118414	CGGTGAAACGGAACAAAA	TGGGGGCTGGGTCTTACG	127
EY117727	CGTGAAGTTGGAAGATGTT	TGATGGCAGTAAAGGATGG	ca. 420
EY121450	AGCGTGCCACCTCCAAT	TCCACAAAACCATCTCG	103
EY122332	GAATCCCACCGCCTCAAC	GCCATAGAATACAGACTT	310
EY119255	CCCAGTACAAGAAGGAC	CACCATCAGGCAACACC	180
DQ841706	CCTGACAAATACAAGCA	GAACAACGAGAACTGGT	144
AF368030	TGGTCGGTATGGGTCAG	TCGTTGTAGAAGGTGTG	148
EY122498	ACAGTACCCAGTTGCTTA	TGCGGATGTCAGTCAGTG	119
EY121779	CACCGTCCACCTAACAGC	CAAATGCCTTCTTCAACC	159
EY118870	ACTTCCCTCGTCTTGCTAA	AATGCCTTCTCGTGTTTCA	ca. 470
EY117521	TCTCATCAACACAAAGCAAA	TTCGTTCAAAGTAGGACAGT	211
EY120707	AACATCGTAGCGTATTGG	TCTTTCTTGACTTTGGAG	188
EY122246	AAGCATCGCCAGGGAAAGAA	TTAGTAGAGGGTTGTTGTCG	169
EY121164	ATCGCTCCCGCTGGCAACT	CGTGTACTTTTCCTTTTCG	ca. 270
EY122186	CTCCCCGTGTTCAATCGT	ATCCTTATGCTATGTTCG	108
AJ251959	TAAAAAGAGGCATCAAGAAT	GCACAAATCAGTAGAAAAAG	176
EY122581	CTAAGGAGCAGGGGAGAC	CTATCAGCCAGAAGCAGA	ca. 470
X96861	TCGGTAACAACAGACTT	TGGAGGAGAGGCAGAGG	91
X96863	GGGTTATCAGCGGAAGT	ATGACCATTAGGGAAGC	183
X96862	GAGAAGATGGAGGAGTT	GTGAGCAGGTTGAAGTG	107
EY122623	CCAGAAATCAAACCACTCG	ACATCATCACCATAAACAT	240
EY122021	TTACGGAACGACAAACG	CGACGGCGACAAACAAG	99
AY766374	GTAGACCTGGACGAGAT	TGAACCTACCCTTGAGC	112
EY120926	TTTATCGCTACCGTGGAAG	AAAAATGGAATGGAGTTAT	ca. 950
EY122155	GGTTGCTGGCTCTCTTCATT	ATTTACTACTGGATTTCGTG	369
EY121912	ACAGGCACGCTACAAAAT	CGCTCACCGACAGACATC	ca. 320
EY122087	GATGTAGTGATGGTGAACG	CCTAATACGACGCCTGGAC	120
GR966210	GAAGCAGCCCGTCTAAAC	CCCAACAAATACACCTCT	222
EY121220	AAATCTTCGTCGTCTTCA	TTGGCGGTCACATCGTTG	213
EY122192	AAAGAAATGACCGAAGC	AGCCACTGCGTATCCTG	ca. 1250
EY121157	AACACGCTGCTGACTTCTG	ATCGCACCTTCTTCCATCG	ca. 540
AF096878	TTTCACCATCGCTTCCATC	TTCATTCGGCTTTACCTAT	157
AF072493	TGTCGGCAAGGCGTATCTC	CTTTCTTCTTCTGTTCGTT	323
EY121086	TCATCGCTCTCAAACCT	TCGTCTCCAATCTTCTT	ca. 950
EY122045	TAATGAGCAGAAGAAAGC	CAGAATGTCAGAATGGTT	265
AY172671	CCGTTAGTTTGTGTGATA	TAATGTTACCCCTTTTCC	343
EY122226	TGGTCAGTGAAGGCTAAG	GCTTTCTTGGGAGTAGG	119
EY119298	GGTTCTACGCTCTGTCG	GTAGGGGGTCTCTCCAT	167
AJ748335	GCTACGACGGTTTCTTC	CGACACTGTTCTCTAAT	142
U48594	CCCACTTCTTCACCAACAAC	TCATCCTTCTTCATCACCAT	118
EY118312	ACCTGGTGTCGCTGTCC	CCGTTGTCCTTGATGTA	112
EY117529	ACGTTCAAGGTGGTGTT	GCTCGACTTGCTGCTGT	ca. 320
EY121788	TTGCGTGTATTGTTTTTCA	ATGGGAGGAGTAGGTTTCA	138
EY118930	AAAGGTAGCGGAGAAGAAGC	GAGTCATAGCGTCATAAAAC	322
GR968654	AAAGATGTGGTAGTGGAA	ACGAAAAGGGGTTATGGT	272
X95606	TTCTCGGGCAGTGGGTATTC	TATTGTTGTATTTATTTTGG	453
EY120733	AGTTCAAGGAGGCGTTCT	GCTTCTGTGGGGTTCTGT	106
EY121800	CACGCTGACCCCGATGACC	GACTGAAGTATAGGACGAT	127
GR961348	GGGAGAGGGCAAATACAA	TGGTCTGGCTGGTGAAGT	ca. 470
EY122387	AGAAGGCAAGAGTGAGC	ACAGCGGCAGATGAGTT	182
EY119869	CGAGTACACGCACCAGT	TCTTCTTCTTGACCTTG	101
EY117580	GTCACCAAGAGCATCAGA	CCAGGAAGTCACCAGTCA	ca. 640
EY121429	TTCAAGGGACTGGGAGAC	TAGGAGGCACGGTAGATG	113
EY122420	AACTTGTAGGGCTTGTGG	GCATTGATGAGGTCGTAT	235
EY117785	CGATGTAACAAATGAAAA	AGGGTATAAAACGCTGACTC	ca. 950
EY121943	CAAACCCTTGCTGCTGA	GATAACTTTCCTGTCGT	114
EY122545	TCCGAACCAATGCCACCAGT	CAATGAAAAACCAATGTAAG	117
EY120570	CTTGATACCCAGATACAG	ATAAGTTCCGAGCCTACA	ca. 380
AJ748325	CATACGGAGTGAAAATCT	TAAAATCGCTACAAAAGT	169
EY121992	CGGCGTAGCAGTAGTAATAA	AATGATGTGTCCTCCAATAG	100
AJ487478	TCATAACATTTCTCACAACG	TTCAACCTCATCGCCATTTC	538
DD177582	GCACGGCTTCCATCCTGA	TATCCTTCCAACCAACTA	174
EY122166	TGAACTCCAAACTCTGAACA	CTGCTCTCTGATGATGATGC	130
EY118907	ACGATGAAAAGACCAAAAG	CAGGATTAGCAGCGAAGAC	156
EY122222	AGGTTGGTCTTGTGATGG	AGGCGATGTTGATGTTCT	ca. 760
AF379640	CCGTGGTCGTATCCTCA	CGCTTCTCAAATCTGTT	111
EY120304	ACATTCGGCACATACAAG	TCAAACACAAAGTCCTCA	ca. 580
EY122528	TCCATGTTGTTCTACGC	ATAAGTTCTCGGGTGAT	158
EY117929	AGGTGGGGACATTGGAT	AGGTACTGAGCGACTTT	97
EY121669	GGGTCGGAGCAAGTTTTT	CGTAGAAGCTGGATAGGG	ca. 630
EY120939	TCCAATGAGTCCCCAATCT	TGCCGAAATAAAAGTCTGT	182
EY119047	GAGGCTCATTCACAGTCC	TTCTCCACCATCAGTTTG	172
EY121680	CTTCCAGCCGCATTACT	GTTTCTATTTCGTTTTTCC	296

## Sheet: Table S4
Table S4. Mapping of Bombyx mori orthologs of Heliothis virescens,Ostrinia nubilalis and Plutella xylostella genes.
B. mori ortholog					Putative gene function	H. virescens		O. nubilalis		P. xylostella
Gene	EST	LG	Mapping method	Ref.		Gene	EST	Gene	EST	Gene	EST
AB079859		1	located on mapped contigs	1	FK506-binding protein		EY121444-EY121446
AB098537		1	directly mapped	1	Y-box protein		EY120101
AY734490		1	FISH	1	triosephosphate isomerase	U23080	EY120750,EY120751
AB041634		1	FISH		IDGF like protein		EY122162,EY122537		FS438566	AB282642
	DC542913	1	directly mapped	2	NADH dehydrogenase (ubiquinone)		GR964932		GH988674
AB186505		1	directly mapped		olfactory receptor	AJ487481
AB186506		1	directly mapped	1	olfactory receptor	AJ748328
AB079865		1	located on mapped contigs		kettin			EU532458
		1	directly mapped				EY120882				BP938135
D10953		1	located on mapped contigs	1	nuclear receptor FTZ-F1			AB568488
	BY930916	1	directly mapped	1			EY122479
EU000385	AV400839	1	directly mapped	1	lactate dehydrogenase		EY118373-EY118376	EU532460
M64336		2	directly mapped	1	invected			AB568275
	BW998051	2	located on mapped contigs		methionine-tRNA synthetase		EY122607
	AV400324	2	directly mapped		cytochrome c oxidase polypeptide VIIC		GR959509		FS438530
	BB990930	2	located on mapped contigs				GR969566
X04226		2	directly mapped	1	silk protein P25				EL928855,FS438497
	BP116331	2	directly mapped		T-complex chaperonin		EY118432-EY118434
AY769292		2	located on mapped contigs	1	ribosomal protein L17A		GR960922		EL929597	AB180421
AY578154		2	directly mapped	1	ribosomal protein S21		GR964274			AB180413
DQ311295		2	located on mapped contigs		nonclathrin coat protein zeta 1-COP		EY117761,EY117762
AY860950		2	directly mapped	1	protein kinase c inhibitor				FS438625
	BP182373	3	directly mapped	1	ADP-ribosylation factor 4		EY117467,EY117468
DQ443144		3	located on mapped contigs		transcriptional adaptor 3		EY121947
D13339		3	located on mapped contigs	2	elongation factor 1 beta					AB180443
	CK517579	3	located on mapped contigs	2			EY121639-EY121657
DQ443368		3	directly mapped		glyoxylate reductase				FS438642
AF465600		3	directly mapped	1	cGMP-dependent protein kinase			AB568466
AY769341		3	directly mapped	3	ribosomal protein S26		GR964519		EL929573	AB180410
	BP177631	3	located on mapped contigs						EL928554		BP937525
AY769280		3	directly mapped	1	ribosomal protein L11				EL929153		BP937372
	BP120290	3	FISH		destabilase 2		GR967915
DQ443358		3	located on mapped contigs		arylphorin				EL928651		BP937257,BP937268
AY769283		3	directly mapped	1	ribosomal protein L13A				EL930081		BP937714,BP937837
	CK491192	3	located on mapped contigs				EY120959,EY120960
		3	located on mapped contigs		storage protein		GR964167		FS438571	AB266595, AB266596
	AU003623	3	located on mapped contigs		lipoprotein receptor	AY898641			EL928875		BP937582,BP937816,BP937835
AY769309		3	located on mapped contigs		ribosomal protein L37A				FS438439	AB180430
DQ443253		3	located on mapped contigs		3-hydroxyacyl-CoA dehydrogenase		EY118280,EY118281		EL928410
	DC561789, DC573084	3	located on mapped contigs	2	mitochondrial porin channel		EY120105-EY120108
DQ311399, DQ311400		3	directly mapped		receptor for activated protein kinase C	AF368031			FS438633	AB189027
D90454		3	directly mapped	1	membrane-bound alkaline phosphatase	EF531619
	AU001659	3	located on mapped contigs				EY117960-EY117971
		3	directly mapped		p82 riboflavin-binding hexamer monomer	AY172682			FS438570
AY769303		3	FISH		ribosomal protein L34		GR960552		GH998134		BP937473,BP938056
AB190802		3	directly mapped	1	Mn superoxide dismutase		GR959517				BP937770
	BP120129	3	located on mapped contigs	2	glutaredoxin		GR969031		EL930102
	CK538412	4	located on mapped contigs	2					GH987771
AB024901		4	located on mapped contigs	1	ribosomal protein L3		EY118436-EY118473		FS438402		BP937170,BP937351,BP937577
	BP116062	4	located on mapped contigs	2	chitin synthase 1		GT187638			AB271784, AB281490
DQ150250		4	located on mapped contigs	2	eukaryotic initiation factor-4a		EY120815-EY120844		EL928635	EU366906
AY690617		4	directly mapped	1	profilin		EY119376-EY119378		FS438638		BP937350
AY099069		4	directly mapped	1	collagen		EY120961-EY120982
AF372836		4	located on mapped contigs	1	dopa decarboxylase	U71428				EF417848
DQ443305		4	located on mapped contigs		S-adenosyl-L-homocysteine hydrolase				FS438649	AB282637
		4	directly mapped						FS438678
DQ517934		4	directly mapped		small GTP binding protein RAB5				EL929859
AY579746		4	directly mapped	1	kiser						BP937655
DQ443129		4	directly mapped		karyopherin alpha 3		EY119524,EY119525		GH996474
AB182582		4	directly mapped	1	Ultraspiracle	AX383958, BD183648				EF417850
AY769304		4	located on mapped contigs		ribosomal protein L35				EL928533	AB180418
AY769307		4	located on mapped contigs		ribosomal protein L36A				EL929141
AY769334		4	located on mapped contigs	2	ribosomal protein S18		EY121736		FS438389	AB180432
DQ311155		5	directly mapped		cystathionine gamma-lyase						BP937594
		5	directly mapped				GR960802		EL929171
DQ311347		5	located on mapped contigs	2	cytochrome c oxidase subunit Va		GR961386		EL929657
	BP115472	5	located on mapped contigs	2					GH989986
	BP184282	5	located on mapped contigs	1			EY122282
DQ311355		5	FISH	2	eukaryotic translation initiation factor 3 subunit 6		EY117451,EY117452
AB234355		5	directly mapped		olfactory receptor	AJ748332
D13338		5	FISH	1	elongation factor-1 alpha	U20135			EL929508,EL928773	EF417849
AB210112		5	FISH	1	protein disulfide-isomerase		EY120035-EY120057		EL929662
DQ311235		5	located on mapped contigs	2	tyrosine 3-monooxygenase protein zeta polypeptide	FJ550359	EY118484,EY121728		GH991199		BP938148
AB007832		5	located on mapped contigs	1	trachealess		EY122359
DQ311154		5	located on mapped contigs		cuticle protein		EY119005,EY119006
DQ311330		5	located on mapped contigs		Wnt inhibitory factor 1		EY121152-EY121156
		5	directly mapped		ornithine aminotransferase				FS438603,FS438604
EU082082		5	directly mapped		nicotinic acetylcholine receptor subunit alpha 6	AF143847, AX009614				GU207835, GU207836
D84452		5	located on mapped contigs	1	cyclin B		EY121456,EY121457
	BP183504	5	directly mapped	2	farnesoic acid O-methyltransferase		EY118673-EY118680		EL930088
	BP182348	5	directly mapped	2	prenylated protein tyrosine phosphatase		EY122445
		5	located on mapped contigs		chemosensory receptor	AJ487483
AF226281		5	directly mapped	1	putative deoxynucleoside kinase		EY122417
	CK534740	5	directly mapped		prolyl carboxypeptidase		EY118941-EY118943
		5	directly mapped				GR961165		EL928805		BP937542
DQ443227		5	directly mapped		H+ transporting ATP synthase subunit g		EY122614		EL930010		BP937256
AY769289		5	directly mapped	1	ribosomal protein L19		EY122604		EL929967		BP937688
	BP123138	5	directly mapped				EY118820-EY118827
	AV398210	5	located on mapped contigs		mitochondrial processing peptidase beta subunit		EY117583
	BB985833, BB991255	5	directly mapped		mitochondrial electron transfer flavoprotein alpha subunit		EY122012
		5	directly mapped		hyphantrin				FS438551
AY769282		5	located on mapped contigs	1	ribosomal protein L13		EY122740		EL929996		BP937460
	CK507707	5	located on mapped contigs								BP937522
	AU001983	5	located on mapped contigs						EL929441		BP938075
	BP124574	5	located on mapped contigs		mitochondrial lipoyltransferase		EY122615
DQ646407		5	located on mapped contigs		poly A binding protein		EY120102-EY120104				BP937987
DQ272299, DQ311338		5	located on mapped contigs		arginine kinase				GH997366	FJ036977
EU082084		5	located on mapped contigs		nicotinic acetylcholine receptor alpha 7-1 subunit	AF143846
DQ443267		6	located on mapped contigs		scolexin B	FJ561484
	BB983277	6	located on mapped contigs				EY118328,EY118329		EL929409
		6	located on mapped contigs		glutathione-S-transferase				FS438475,FS438476
	CK492649	6	located on mapped contigs						FS438670
	BY914249	6	located on mapped contigs				GR971881		GH991674
DQ443411		6	located on mapped contigs		pyruvate dehydrogenase E1 component beta subunit		EY119520-EY119523
	BB985833	6	located on mapped contigs		ATP synthase subunit c		EY122398		EL929256		BP937393
AY729285		6	directly mapped	1	ribosomal protein L15				FS438416,FS438417	AB180427
AY618899		6	located on mapped contigs	1	chorion b-ZIP transcription factor		EY118214-EY118218		EL929861		BP937400
AB176691		6	directly mapped	1	glutathione S-transferase theta		EY121944		EL928839
AF005384		6	located on mapped contigs	1	attacin	GQ120502			AB568279
AB170011		6	directly mapped	1	ras3		EY122142
	AV406061	6	located on mapped contigs				GT193247		EL928828
	CK511233	6	located on mapped contigs		beaten path II		EY122587
AB206403		6	directly mapped	1	FK506-binding protein		EY119040,EY119041
	CK508838	6	located on mapped contigs				EY122659
AB026260		6	directly mapped	1	cadherin	AF367362		AY627288		AY529117, AY529118
BN000406		6	located on mapped contigs	2	mod(mdg4) gene		EY119510-EY119515				BP937444
DQ311274		6	located on mapped contigs		prefoldin beta subunit		EY118329		EL929409
DQ443247		6	directly mapped		carboxylesterase		EY120232-EY120261
DQ311339		7	directly mapped	2	ATP synthase		GR960714		GH992737		BP937494,BP937572
		7	directly mapped	2			EY122388
AB052914		7	directly mapped	1	chitinase					FJ613480
DQ311310		7	directly mapped	1	serine protease inhibitor		EY120920,EY120921			AB282641
DQ443254		7	located on mapped contigs		hemocyte protease		EY119748,EY119749
		7	directly mapped		glutamate-gated chloride channel					GQ221939
AY192575		7	located on mapped contigs	1	glutathione S-transferase 1				GH996492
AB041636		7	located on mapped contigs	1	annexin		EY119493-EY119507		EL929659
AB164193		7	directly mapped	1	ribonuclease L inhibitor		EY120066-EY120072
		7	located on mapped contigs		mannose-1-phosphate guanyltransferase beta		EY122685
DQ311309		7	directly mapped	2	sericotropin				FS438647		AB180437,AB189031
D21206		7	directly mapped	1	Kinesin-like protein			AB568465
AY769342		7	located on mapped contigs	1	ribosomal protein S27		GR965079		EL929978		BP937300
DQ443383		8	directly mapped		NADH-ubiquinone oxidoreductase		EY121907		EL928394		BP937693
	BM658364	8	directly mapped	2			GR963828		FS438528		BP937613
	DC532116	8	directly mapped	2	transmembrane protein 222		EY122015
	AV401968	8	directly mapped	2	death-associated LIM only protein		EY118386-EY118395
DQ311422		8	located on mapped contigs	2	translocon-associated protein gamma		GR966970		GH998316		BP938001
AF317420		8	directly mapped	1	lysosomal-associated transmembrane protein						BP937934
AY769296		8	located on mapped contigs		ribosomal protein L27				FS438425,FS438426		AB180435
AY626066		8	located on mapped contigs	1	transformer-2		EY121815
EF121427		8	directly mapped		enolase		EY120711-EY120716
DQ097778		8	directly mapped		high-affinity octopamine transporter protein			DQ097786
DQ311145		8	directly mapped		ADP-ribosylation factor		EY119790-EY119799		EL929590		BP937515
	BP182694	8	directly mapped						FS438656,FS438657		BP937420
U07847		8	located on mapped contigs	1	alpha-amylase			U04223-U04226			BP937376
		9	directly mapped						EL928586
	CK500660	9	directly mapped	2					GH997491
	AV398513	9	located on mapped contigs		synaptic vesicle protein SV2		EY120449-EY120454
	AV403875	9	directly mapped		moesin		EY118420-EY118427
AB017520		9	directly mapped	1	Bacteriophage T7 lysozyme-like protein 2		GR969649		EL929964,EL929268
	AV398545	9	directly mapped	2	inorganic pyrophosphatase	AX247467
		9	located on mapped contigs				GR967888		GH996593
DQ443321		9	located on mapped contigs		H+ transporting ATP synthase beta subunit isoform 1						BP937736
		9	directly mapped						FS438967
AB011497		9	directly mapped	1	aminopeptidase N					X97878, AY564237
AB126230		9	directly mapped	1	pyruvate kinase		EY117437-EY117439
	AU000576	9	FISH		proliferation-associated 2G4 protein		EY121802		EL928482
AB084922		9	directly mapped	1	heat shock cognate 70 protein		EY118057-EY118116	AB568277
AB072305		9	directly mapped	1	alpha-tubulin				EL929415		BP937130,BP937265
		9	directly mapped						EL929443
	BY918457	9	directly mapped	2					GH988952
AB062683		9	directly mapped	1	fibrillin-like protein		EY118342-EY118346
AY706956		9	located on mapped contigs	1	ribosomal protein S14		GR968406		EL928771	AB180670
AY769294		9	located on mapped contigs	1	ribosomal protein L24		EY122571		EU532439	AB180446
	CN373997	9	located on mapped contigs		vacuolar ATPase subunit a		EY122126
AB206402		9	directly mapped	1	cyclophilin-like protein		EY119467		GH994687
EU093074		10	located on mapped contigs		laccase 2		AB568290
	AV405651	10	located on mapped contigs	2			GR965603		EL928901
DQ443128		10	located on mapped contigs		GTP binding protein		EY117878,EY117879
AY387408		10	located on mapped contigs	1	CP8 precursor						BP938125
DQ985594		10	directly mapped		carboxypeptidase				FS438583
		10	directly mapped						FS438879
	CK560761	10	directly mapped	2			EY117883
	BP181289	10	directly mapped				GR960796
	BP123446	10	located on mapped contigs		elongation factor Tu		EY119745-EY119747
DQ985591		10	located on mapped contigs		Bax inhibitor-1 (BI-1)		EY121137-EY121142		EL929324
AY769293		10	directly mapped	1	ribosomal protein L23A				AB568281		BP937611,BP937766
	BW997417	10	directly mapped		X box binding protein-1		EY121195-EY121202		FS438671
AF246696		10	located on mapped contigs	1	acyl-CoA binding protein				EL928737,EL929193
DQ086424		10	directly mapped	1	diapause bioclock protein				GH993479		BP937412
AF246695		10	directly mapped	1	acyl-CoA binding protein				EL928845,EL929478	AB180434
AF098303		10	located on mapped contigs	1	cytosolic juvenile hormone binding protein 36 kDa subunit		EY122101
	AU005812	10	directly mapped				GR970828				BP937936
AB063190		10	directly mapped	1	annexin B	FJ622888
D43943		10	located on mapped contigs	1	ecdysone receptor	Y09009				EF417851, EF417852
AB003035		10	directly mapped	1	lebocin		GR960585
FJ598129	BJ982250	10	located on mapped contigs		ribonucleoprotein		EY122195
DQ311354		10	located on mapped contigs	2	eukaryotic translation initiation factor 1A		GR965817				BP937791
DQ443139		10	directly mapped		syndecan binding protein		EY120901-EY120912
DQ105979		10	directly mapped	1	dopamine transporter			DQ097777
	BP126421	11	directly mapped		mitochondrial ribosomal protein S35		EY121734
DQ443337		11	located on mapped contigs	2	NADH-ubiquinone reductase				AB568282		BP937618
		11	located on mapped contigs						EL929485
AF325211		11	located on mapped contigs		protein disulfide isomerase		EY120692-EY120704
	CK562538	11	directly mapped	2	3-2trans-enoyl-CoA isomerase		EY122619
	AU002595	11	directly mapped		CDK5 regulatory subunit associated protein				FS438626
DQ443359		11	directly mapped		H+ transporting ATP synthase subunit d		GR961507		GH992371	GU947650
		11	directly mapped						EL928390,GH995691
D16230		11	located on mapped contigs	1	pheromone biosynthesis-activating neuropeptide	AY173075
AB026441		11	located on mapped contigs	1	beta-1,3-glucan recognition protein		EY121095,EY121096		FS438457,FS438458
		11	directly mapped				GR970491		EL930062
AY583363		11	FISH		ribosomal protein S28				FS438397,FS438398	AB180425
	AU000213	11	located on mapped contigs						GH996136
	BY936521	11	located on mapped contigs	2					EL928716,GH988983
AY769287		11	directly mapped	1	ribosomal protein L18				EL928699,GH995408		AB180448
DQ443223		11	directly mapped		DEAD box polypeptide 5 isoform 1		EY120078				BP937512,BP937765
AY769271		11	directly mapped	1	ribosomal protein L4	EU523116					BP937870,BP938118
AY769284		11	located on mapped contigs	1	ribosomal protein L14		EY119508,EY119509		EL930113		BP937273
	AU002885	11	located on mapped contigs	2					GH995565
DQ443122		11	located on mapped contigs	2	alcohol dehydrogenase		EY120152-EY120156
AY763110		11	directly mapped	1	suppressor of profilin 2		EY117442,EY117443	AB568464
	BJ985383	11	directly mapped	2			GR971164
	AU005394	11	located on mapped contigs	1	beta-1,4-mannosyltransferase		EY118212,EY118213
	BP125682	12	located on mapped contigs		cytochrome c oxidase CIIa				EL928959
	AU000883	12	directly mapped						EL928604
	AV403631	12	directly mapped	2					GH995139
AB008449		12	located on mapped contigs	1	P109		EY119573-EY119584
	BP122664	12	directly mapped						GH987205
L37416		12	directly mapped	1	lysozyme	U50551			AB568283		BP937175
AY769277		12	located on mapped contigs	1	ribosomal protein L9		EY121812				BP937283
		12	located on mapped contigs						FS438620
	BP117568	12	directly mapped	2			GR970058
DQ443218		12	located on mapped contigs		H+ transporting ATP synthase delta subunit				EL928958,EL929323
DQ311369		12	directly mapped		L-isoaspartyl protein carboxyl methyltransferase				FS438608
AY099068		12	directly mapped	1	prolyl 4-hydroxylase alpha subunit		EY122451		EL929785
	AV404477	13	located on mapped contigs	2			GR970873		GH988147
		13	directly mapped						EL929854
	BY921003	13	directly mapped	2					EL928432
	DC543817	13	directly mapped		GDP-fucose transporter		EY117908,EY117909
DQ443399		13	located on mapped contigs		transaldolase		EY119743,EY119744
AY769301		13	directly mapped	1	ribosomal protein L31	AJ298149				AB180412
AB195972		13	located on mapped contigs	1	small heat shock protein		EY118320,EY118321				BP937373
DQ311404		13	located on mapped contigs		ring box protein		GR964860		AB568287
AY769297		13	located on mapped contigs		ribosomal protein L27A				FS438427	AB099492, AB180411
AY461436		13	directly mapped	1	Lim protein		GR960867		FS438624		BP937391,BP937563
AY769315		13	directly mapped	2	ribosomal protein S2		EY118995-EY118998	AB568463			BP937186
AY873787		13	directly mapped	1	troponin I			AB568462			BP937451
AY769290		13	located on mapped contigs	1	ribosomal protein L21		EY118360,EY118361		EL928478	AB180424
	BP177638	13	directly mapped				GR966686
	BP115990	13	located on mapped contigs						FS438676		BP938202
DQ443378		13	located on mapped contigs		muscular protein 20		GR961324		FS438560,FS438561		BP937606
	BP125295	13	directly mapped						GH994084
D49948		13	located on mapped contigs	1	DNA supercoiling factor		EY120866-EY120868
M76430		14	directly mapped	1	fibroin L-chain				FS438494
AB330446		14	directly mapped		neuropeptide receptor		EY122106
		14	located on mapped contigs				EY122734
AY769332		14	located on mapped contigs	1	ribosomal protein S16		GR966201		FS438386		EU818707
	AV398626	14	directly mapped		proteasome subunit alpha		EY122120
AY769316		14	directly mapped	2	ribosomal protein S3				DQ988989		BP937119
AB017522		14	directly mapped	1	esterase-like protein		GR969506
	BP183670	15	located on mapped contigs				GR963703		EL929880,EL928601		BP937819
AY461709		15	located on mapped contigs		will die slowly		EY122172,EY122631
AB178640		15	located on mapped contigs	2	aquaporin				GH991264
	BP182493	15	directly mapped	1			EY117459,EY117460
DQ443153		15	located on mapped contigs		vacuolar H+ ATP synthase 16 kDa proteolipid subunit	L16884			EL929902
	AV400343	15	directly mapped		vesicle trafficking protein SEC22		EY120143-EY120145
DQ443288		15	located on mapped contigs		eukaryotic translation initiation factor 3 subunit 2 beta		EY118631				BP937216
FJ147197	AU002182	15	located on mapped contigs		hatching enzyme-like protein				EL929489
AB206395		15	located on mapped contigs	1	casein kinase 2 beta subunit		EY120481,EY120482
		15	located on mapped contigs	2					EL928393
AJ490511		15	directly mapped	1	ribosomal protein P1		GT199599		GH998036	AB180436
AY769279		15	located on mapped contigs		ribosomal protein L10A		GR960935		FS438411		BP937236
AY769322		15	directly mapped	1	ribosomal protein S8		EY122260		FS438380	AB180415
AY769276		15	located on mapped contigs	2	ribosomal protein L8		EY121710,EY121711		EL928885	AB180407
AY706958		15	located on mapped contigs	1	ribosomal protein S23		GR969583		EL928511	AB180672
AY769272		15	FISH	1	ribosomal protein L5		EY119800,EY119801		FS438403		BP937547,BP937640,BP937748
AJ457827		15	directly mapped	1	ribosomal protein P0		EY120157-EY120188	AB568276			BP937139
DQ443367		15	directly mapped		gasp precursor		GR970774
AB016836		15	directly mapped	1	heat shock 70 kD protein cognate		EY118476,EY118477		EL928755
AY769319		15	FISH	1	ribosomal protein S5		EY122768		EL928745		BP937151
	BB988392	15	located on mapped contigs				EY122758				BP937652
AY769275		15	directly mapped	1	ribosomal protein L7A		EY121700-EY121702		EL929706		BP937374,BP937405
AY438331		15	directly mapped	1	thiol peroxiredoxin		EY117844-EY117851
		15	directly mapped						EL929792
AB026735		16	directly mapped	1					EL930065
		16	directly mapped						EL929838
AB100454		16	FISH		Or83b	AJ487477		GQ844877		AB263117, GQ923610
D85134		16	directly mapped	1	cdc2		EY117726-EY117728
AY769269		16	directly mapped	1	ribosomal protein P2					AB180444
DQ443264		16	directly mapped	2	phosphatidylethanolamine binding protein isoform 1		EY121834		EL929540
DQ443365		16	directly mapped	2	fructose 1,6-bisphosphate aldolase		EY119253-EY119258
AY769273		16	directly mapped	1	ribosomal protein L6				GH998048		BP938171
DQ645460		16	located on mapped contigs	2	eukaryotic translation initiation factor 3 subunit 8		EY118703,EY118704,EY122332
DQ109670		16	directly mapped	2					EL929915
D49370		16	directly mapped	1	prophenoloxidase-1	DQ841706				GU214206, GU199189
	BP115001	16	directly mapped				GR965185
	BP115951	16	directly mapped						EL928629
DQ311380		16	directly mapped	2	myosin light polypeptide 9		EY121449-EY121451
	BP181923	16	directly mapped						EL929592
DQ443318		16	directly mapped		tyrosine 3-monooxygenase/tryptophan 5-monooxygenase activation protein epsilon polypeptide		EY118410-EY118414
	CK534721	16	directly mapped				EY118485,EY118486
AY341912		16	located on mapped contigs	1	apolipophorin III		GR958410		FS438500		BP938180
AY769299		17	directly mapped	2	ribosomal protein L29				GH988832	AB180428
DQ646414		17	directly mapped	1	signal recognition particle		EY121779,EY122235
U49644		17	located on mapped contigs	1	cytoplasmic actin	AF368030			FS438513-FS438515
		17	located on mapped contigs				EY122498
AB045595		17	FISH		cathepsin B		EY117509-EY117524		FS438578
DQ443404		17	located on mapped contigs		beta-1,3-galactosyltransferase			AY821557		GU321345
AB062685		17	directly mapped	1	ribosome-associated protein SA		EY121032-EY121036	AB568274			BP938089
DQ497202		17	directly mapped	2	eukaryotic translation initiation factor 3 subunit 9		EY120705-EY120708
DQ321287		17	directly mapped		ribosomal protein S33				FS438401
DQ311300		17	directly mapped		proteasome 26S non-ATPase subunit 4		EY122246
DQ645459		17	directly mapped		eukaryotic translation initiation factor 3 subunit 7		EY118869,EY118870
AY769291		17	directly mapped	1	ribosomal protein L22		GR960902		FS438418,FS438419		BP937599
	AU002332	17	directly mapped				GR958597		EL929942		BP937221
AY769310		17	located on mapped contigs		ribosomal protein L38				EL929643	AB180440
AY578155		17	directly mapped	1	ribosomal protein S24				FS438394,FS438395	AB180429
	AV398356	18	located on mapped contigs		butyrate response factor 1		EY122186
	BP119892	18	directly mapped						FS438663
	BP177676	18	located on mapped contigs		mitochondrial methylmalonate-semialdehyde dehydrogenase		EY122050
	BP179510	18	directly mapped				EY122610
DQ813503		18	directly mapped		myofilin		GR958919				BP937708
		18	directly mapped		endopeptidase subunit C8						BP937752
		18	located on mapped contigs						EL929694
DQ443284		18	directly mapped		chymotrypsin-like serine protease				EL929887,GH991856
AB046361		18	directly mapped	1	elongation factor 1 gamma		EY118871-EY118888
AJ251958		18	directly mapped	1	sensory neuron membrane protein-1	AJ251959
	AU006009	18	located on mapped contigs						AB568280
	CK505184	18	located on mapped contigs						AB568288
DQ443126		18	located on mapped contigs		26S protease regulatory subunit 6B				FS438579		BP937392
EF114391		18	directly mapped		vacuolar ATP synthase catalytic subunit A		EY121164-EY121166
DQ646416		18	directly mapped		signal recognition particle receptor alpha subunit		EY122581
AB030701		18	directly mapped	1			GR969235		FS438610
DQ443213		18	directly mapped		tetraspanin E118
AY769335		18	located on mapped contigs		ribosomal protein S19				FS438391		BP937553
AJ973409		19	located on mapped contigs		chemosensory protein				FS438484
AB243754		19	located on mapped contigs		chemosensory protein		GR965492		AB568284
D86601		19	directly mapped	1	DEAD family RNA helicase		EY122021				BP938112
DQ515926		19	directly mapped	2	translation elongation factor 2		EY121098-EY121123
X94988		19	located on mapped contigs	2	general odorant binding protein 1	X96862				EU163980, EU368114
AF509238		19	located on mapped contigs	1	chemosensory protein		GR958738		FS438481
AJ973405		19	directly mapped	2	chemosensory protein	AY101511				EF186791, EF186792
AB243748		19	located on mapped contigs		chemosensory protein	AY101512			FS438482		BP937341
X94989		19	located on mapped contigs	1	general odorant binding protein 2	X96863				EU368115, EU754719
DQ443430		19	located on mapped contigs		phosphatidylinositol glycan		EY122623
X94987		19	directly mapped	1	pheromone binding protein	X96861			FS438485,FS438486		FJ201994
DQ311275		19	directly mapped	2	glutamyl-tRNA amidotransferase subunit B		GR959286
DQ311340		19	directly mapped		ATP synthase		EY120291-EY120295
	AV400960	19	located on mapped contigs				EY118633-EY118641		GH996209
	BP122644	19	located on mapped contigs		gelsolin		EY118647-EY118652
DQ311352		19	located on mapped contigs	2	microtubule-associated protein RP/EB family member 3				GH998461
		19	directly mapped						EL929195
AF361483		19	directly mapped	1	serpin					AB282640
DQ443141		19	directly mapped		salivary secreted ribonuclease		EY120922-EY120926
DQ443423		20	directly mapped	2	FK506-binding protein		EY121912
DQ443282		20	directly mapped	2	cytochrome c oxidase subunit Vb		GR966210		GH991002
DQ097788		20	directly mapped	1	octopamine transporter protein		DQ097796
AY618900		20	located on mapped contigs		CCAAT/enhancer-binding protein gamma		GR967825		FS438653
DQ073458		20	directly mapped	1	eukaryotic translation initiation factor 2 alpha subunit		EY122087
AY676608		20	directly mapped	1	vitellogenin receptor		EY121217-EY121221
DQ311429		20	directly mapped		vacuolar ATP synthase subunit G				FS438634
AB065132		20	directly mapped		trypsin-like proteinase			AY513651			BP937338
AY769321		20	directly mapped	1	ribosomal protein S7			AB568278		AB180420
AY769274		20	FISH		ribosomal protein L7		EY122643			AB180451
		20	directly mapped						GH994780
	BW997539	20	directly mapped		enoyl-CoA hydratase/isomerase		EY122192
DQ091832		20	located on mapped contigs		ribosome-associated membrane protein 4		EY122155
AY769336		20	directly mapped	1	ribosomal protein S20		EY122352		EL929388	AB180449
		20	directly mapped		serine/threonine-protein phosphatase 2A regulatory subunit B'' subunit gamma		EY122055
	AV400397	20	located on mapped contigs				EY122753
AY769327		20	FISH		ribosomal protein S12		EY121993		EL928413,EL929266	AB180426
DQ443393		21	located on mapped contigs		sorbitol dehydrogenase		EY121157,EY121158
EU143793, EU082075		21	directly mapped		nicotinic acetylcholine receptor alpha-2 subunit	AF096878
AY769286		21	located on mapped contigs		ribosomal protein L17		GR969055		EL928438		BP937384
GU322819		21	directly mapped		coatomer protein complex subunit epsilon				GH995597
		21	directly mapped		voltage-gated sodium channel alpha subunit	AF072493				AB265177
	CK518341	21	located on mapped contigs	2	beta-ureidopropionase		EY122045				BP937794
AY769320		21	located on mapped contigs	1	ribosomal protein S6				EL929444		BP937208
AY769306		21	directly mapped		ribosomal protein L36A				FS438436	AB180419
AY706957		21	located on mapped contigs	1	ribosomal protein S15				FS438382	AB180414
DQ855522		21	directly mapped		chemosensory protein				FS438483
	AU004975	21	directly mapped		tubulin-specific chaperone A		EY121672-EY121674
DQ443195		21	located on mapped contigs		fructose-1,6-bisphosphatase				AB568285
	AU005469	21	directly mapped		CCT-gamma protein		EY121086,EY121087
	AU002212	21	located on mapped contigs						EL928874
DQ443312		21	directly mapped		tropomyosin 1				EL929499	AB189025
AY769333		21	located on mapped contigs	1	ribosomal protein S17		GR960283		EL929937	AB180423
		21	directly mapped		mitochondrial ATP-dependent protease		EY122467
DQ311253		21	directly mapped	2	cell death-regulatory protein GRIM19		GR959196		GH995709		BP937305
AB090887		22	directly mapped	1	calreticulin		EY119284-EY119305
D00738		22	directly mapped		serpin					AB189029, AB295498, AB295499
AY769308		22	directly mapped	1	ribosomal protein L37		EY122226		EL928405,EL929341	AB180422
	CK510334	22	directly mapped	2	3-hydroxyacyl-coa dehyrogenase				FS438635
AY769318		22	FISH	2	ribosomal protein S4		EY122462				CS677790,CS678029
D90082		22	directly mapped	1	prothoracicotropic hormone	AY172671
	BY943007	22	directly mapped	2			GR963830
AB062103		22	FISH		glycoprotein				FS438505-4385008
	CK535466	22	located on mapped contigs		cytochrome C1 heme lyase		GR969939		FS438527
DQ515927		23	located on mapped contigs		short/branched chain acyl-Coenzyme A dehydrogenase		EY122213,EY121788
AB158647		23	directly mapped	1	Bm44		EY118930,EY118931
	CK543860	23	located on mapped contigs						FS438672
	AU001912	23	directly mapped						EL929392,EL929920
	BY939117	23	directly mapped	2	small nuclear ribonucleoprotein		GR968654
DQ443279		23	located on mapped contigs	2	H+ transporting ATP synthase O subunit isoform 1		GR961460		EL929165,GH996553
	BY924190	23	directly mapped	2			GR971396
DQ311341		23	directly mapped		calmodulin		EY120731-EY120734				BP937967
AF281073		23	directly mapped	1	inhibitor of apoptosis				FS438614
X95607		23	directly mapped	1	octopamine receptor	X95606
AB196700		23	located on mapped contigs	1			GR964839		FS438619
AY769346		23	directly mapped	1	ribosomal protein S30				FS438399		BP937184
X12978		23	located on mapped contigs	1	sex-specific storage-protein	U48594			AB568289		BP937258
AB234358		23	directly mapped		olfactory receptor	AJ748335
	BP124571	23	directly mapped				GR970325		FS438489		BP937491
AY426971		23	located on mapped contigs	2	fibroinase precursor		EY118307-EY118312
	BY938896	23	directly mapped	2					GH998042
AY297160		23	directly mapped	1	cathepsin D		EY117529,EY117530
AB196703		23	located on mapped contigs	2			GR968829
AB019538		23	directly mapped	1	moricin		GR965596
		23	directly mapped		juvenile hormone epoxide hydrolase				GH989302
	AV405549	23	directly mapped				GR959959		FS438887
AY461705		23	directly mapped	2	Cu/Zn superoxide dismutase		EY121800		GH995651	AB189024
DQ443397		23	located on mapped contigs		thymosin isoform 1		EY119312-EY119316
		23	located on mapped contigs				GR961075
	BP115542	23	located on mapped contigs				GR970639
AY769288		23	located on mapped contigs		ribosomal protein L18A					AB180445
		23	located on mapped contigs						FS438680
AB196702		23	directly mapped	1			GR961348		GH997370
AB048205		24	directly mapped	1	ribosomal protein L32				EL928863,FS438430	AB180441
		24	directly mapped		ryanodine receptor	AF009345
	AU002677	24	directly mapped		chaperonin		EY119741,EY119742
AY426343		24	directly mapped	1	Sui1				EL930101,FS438567
	BJ985467	24	located on mapped contigs				EY122420
DQ443357		24	located on mapped contigs		actin-depolymerizing factor 1		EY119851-EY119869		EL928570,EL929509		BP937174
	DC543753	24	FISH	2			EY122387
DQ443196		24	directly mapped	2	ferritin		EY117573-EY117581		EL929839,FS438533
AY227000		24	directly mapped	1	ADP/ATP translocase		EY121392-EY121434		EL928585		BP937705
DQ443390		24	directly mapped		phosphate transport protein		EY118409
	BJ985752	24	directly mapped	2			GR967716		GH992608
DQ443250		24	directly mapped	2	ferritin isoform 1		EY118974-EY118981		FS438535,FS438536
AF513368		24	located on mapped contigs	1	masquerade-like serine proteinase				FS438586		BP938100
U94993		25	directly mapped	1	rad51		EY121992
		25	located on mapped contigs				EY117912,EY117913
DQ667967		25	directly mapped		eukaryotic translation initiation factor 4AIII		EY118209-EY118211				BP937659
	BP184315	25	directly mapped				GR969892
	AV398721	25	directly mapped	2					GH995723
	CN374568	25	directly mapped		transport protein SEC13		EY121943		EL929251		BP938018
AB234351		25	directly mapped		olfactory receptor	AJ748325
		25	located on mapped contigs		single domain major allergen protein				EL929152	EU137131
AY769340		25	located on mapped contigs	1	ribosomal protein S25		GR963047
DQ525203		25	directly mapped		ras-related GTP-binding protein		EY117784,EY117785
AF287267		25	directly mapped	1	juvenile hormone esterase	J04955
DQ443363		25	located on mapped contigs		copper transporter		EY117440,EY117441				BP937548
	AU004516	25	directly mapped				EY122545		EL928838,FS438594
	BB990282	25	located on mapped contigs		26S protease regulatory subunit 4		EY120569,EY120570
AF013572		25	located on mapped contigs	1	small GTP-binding protein (rabB)		EY122029				BP937720
AY769345		25	directly mapped	1	ribosomal protein S29		GR963292		EL929799	AB180417
		25	directly mapped						EL928892
AJ011573		26	directly mapped		C-type lectin		EY118907-EY118927
	BP121086	26	located on mapped contigs		THO complex 3		EY122222
	BW999032	26	directly mapped		protein phosphatase regulatory subunit		EY121809
		26	directly mapped								BP937745
AY769969		26	directly mapped	1	casein kinase I alpha		EY120464,EY120465				BP937639
EF107513		26	directly mapped		vacuolar ATP synthase subunit B	S61797			GH994287		CS677798,CS678049
		26	located on mapped contigs		chemosensory receptor	AJ487478
DQ233467		26	located on mapped contigs		cecropin E		GR965364		FS438445
	BJ985459	26	directly mapped						FS438659,FS438660
AB255163		26	directly mapped	2	octopamine receptor	DD177582
DQ443134		26	directly mapped		peripheral-type benzodiazepine receptor		EY122658		GH997437
	BP123427	26	directly mapped	2	isocitrate dehydrogenase		EY122166
AJ011573		26	directly mapped		lipopolysaccharide binding protein				FS438455,FS438456
DQ443134		26	directly mapped		peripheral-type benzodiazepine receptor				GH997437
AB195971		27	directly mapped	1	small heat shock protein			AB568468
DQ311189		27	located on mapped contigs	2	70-kDa heat shock protein					AB325801
DQ443244		27	located on mapped contigs		eukaryotic translation initiation factor 4E-binding protein 2		EY121679,EY121680
AB060275		27	located on mapped contigs	1	90-kDa heat shock protein		EY119044-EY119051		EL929806	AB214972
		27	directly mapped				EY120299-EY120301
AF315317		27	directly mapped	1	small heat shock protein			AB568467
	CK514730	27	directly mapped		pyrroline-5-carboxylate reductase 1		EY120313,EY120314
AB056651		28	located on mapped contigs	1							BP937293
		28	directly mapped		mitochondrial ribosomal protein L24				FS438424
X05185		28	FISH		actin		EY121150,EY121151			AB282645
DQ311199		28	directly mapped	2	ATPase subunit C		EY117928,EY117929
DQ443164		28	directly mapped		heme oxygenase				FS438628
EF198104		28	directly mapped		6-phosphogluconolactonase		EY120304-EY120306
		28	directly mapped				EY120939,EY120942
DQ443278		28	located on mapped contigs	2	H+ transporting ATP synthase gamma subunit		EY122528		EL929482,EL929255
DQ443416		28	located on mapped contigs		nonmuscle myosin essential light chain		GR968457		GH992513
GQ338156		28	directly mapped						AB568286
D16233		28	located on mapped contigs	1	vitellin-degrading protease precursor				FS438650
AY706955		28	directly mapped	1	ribosomal protein S11	AF379640			EL929874		BP937508,BP937524
	CK530917	28	directly mapped	2			GR964172
	BP184133	28	directly mapped		NSFL1 cofactor p47		EY121668,EY121669
	BP122665	28	directly mapped						GH999355
							Ref. 1 Yasukochi et al. (2006) Genetics 173:1319–1328.
							Ref. 2 Yasukochi et al. (2009) PLoS ONE 4:e7465
							Ref. 3 Miao et al. (2005) Proc. Natl. Acad. Sci. USA 102: 16303-16308.

## Sheet: Table S1
	Table S1 Number of O. nubilalis cDNA clones with sequences in public databases.
	Stage	Tissue	T7 primer	SP6 primer	Total*
	embryo within 1 day after oviposition		15	4	17
	last instar larva	middle silk gland	2	0	2
	wandering larva	epidermis	98	23	108
		hemocyte	57	15	69
		Malpighian tubule	18	3	19
	pharate pupa	fat body	174	29	182
		midgut	24	1	24
	pupa	whole body	69	14	79
	male adult	antenna	82	2	84
		hair pencil	2	1	3
	female adult	pheromone gland	28	6	29
		antenna	6	3	9
	Total		575	101	625
	* Total is not the sum of the number of clones sequenced with T7 and SP6 primers since some clones were sequenced with both primers.

## Sheet: Table S8
Table S8. Genes Contained in Heliothis virescens, Ostrinia nubilalis and Plutella xylostella BACs ordered according to BACs and chromosomal locations of B. mori orthologs.
H. virescens		O. nubilalis		P. xylostella		Putative function	B. mori
gene	BAC No.	gene	BAC No.	gene	BAC No.		LG	location in Kaikobase
EY121444	32L20					FK506-binding protein	1	6438054-6441054
		EU532458	05P02			kettin	1	6524661-6525956
EY122537	18A18	FS438566	48J18	AB282642	17H16	IDGF like protein	1	8533563-8553627
U23080	05B09	DQ204988	10E06, 36C09			triosephosphate isomerase	1	9027102-9023568
				BP938135	27F22		1	9375322-9376516
		AB568488	22G03			FTZ-F1	1	11667857-11753363
AJ748328	14P02					chemosensory receptor	1	16447827-16432775
EY122479	09N03						1	17281530-17282806
EY118373	18O19	EU532460	23A08			lactate dehydrogenase	1	17338625-17350605
EY122607	06J24					methionine-tRNA synthetase	2	1398888-1389434
		FS438625	36D17			protein kinase c inhibitor	2	4162768-4159572
EY118432	34M08					T-complex chaperonin	2	4266017-4261038
GR960922	12B16	EL929597	08M23	AB180421	27J20	ribosomal protein L23	2	5306227-5309415
EY117762	09L16					nonclathrin coat protein zeta 1-COP	2	5968075-5984233
				AB180413	02L19	ribosomal protein S21	2	9846934-9848926
		EL928855	33E21			25 kDa silk glycoprotein	2	10373811-10368876
				AB180410	15A20	ribosomal protein S26	3	1241322-1240033
EY118281	04J19	EL928410	35L22			3-hydroxyacyl-CoA dehydrogenase	3	1292571-1280072
		FS438431, FS438432	26D15			ribosomal protein L34	3	1555939-1558363
AF368031	10H21	FS438633	40K20	AB189027	19C10	Receptor for activated protein kinase C	3	3690571-3692886
EY120960	11I16						3	3782954-3783612
EY117960	01A11						3	7373090-7376911
		FS438571	09C14			storage protein	3	8616546-8618285
AY898641	22I23					lipoprotein receptor	3	8619491-8620195
		EL928651	09C14	BP937268	01C10	arylphorin	3	8654570-8650142
AY172682	03E23					p82 riboflavin-binding hexamer monomer	3	8685902-8670961
				BP937714, BP937837	17B02	ribosomal protein L13A	3	8883278-8885694
		EL929153	27C12	BP937372	15P23	ribosomal protein L11	3	9672955-9676544
EY117468	14I21					ADP-ribosylation factor 4	3	10144592-10145037
EY121947	14F20					transcriptional adaptor 3	3	10826461-10824773
		FS438439	03I02, 17P18	AB180430	27D18	ribosomal protein L37A	3	11069030-11070634
EY120107	01G20					mitochondrial porin channel	3	12376563-12372690
		EL928554	14M01			juvenile hormone diol kinase	3	17355147-17355756
		GH987771	23P06, 29G15				4	4715276-4716033
AX383958	55I09					Ultraspiracle	4	6417495-6451584
				AB180418	01E10	ribosomal protein L35	4	8310432-8308816
				BP937655	01M09	kiser	4	10799940-10800541
EY118472	22B18	FS438402	09K23	BP937170, BP937351, BP937577	02P05	ribosomal protein L3	4	10814055-10814738
		EU376026	29G21	AB271784, AB281490	15P06	chitin synthase 1	4	12319537-12321163
U71428	25B05					dopa decarboxylase	4	12534917-12508890
EY121736	23C18	FS438389	39N13	AB180432, BP937166	15O08	ribosomal protein S18	4	12627378-12625135
				AB282637	15O08	S-adenosyl-L-homocysteine hydrolase	4	12645185-12645869
		FS438638	36P05	EU366906	17C22	eukaryotic initiation factor-4a	4	13065794-13062463
		EL929141	39G16			ribosomal protein L36A	4	13236736-13237092
EY119524	09E21	GH996474	23J13			karyopherin alpha 3	4	19676922-19670291
EY122614	19E07	EL930010	33A22, 33E05, 43O20			H+ transporting ATP synthase subunit g	5	2062715-2061995
EY122604	15B06	EL929967	46C12	BP937688	02I20	ribosomal protein L19	5	3574635-3577674
EY117583	22K01					mitochondrial processing peptidase beta subunit	5	4167771-4165488
EY118679	05C04					farnesoic acid O-methyltransferase	5	6112467-6113309
EY119006	55L08					cuticle protein	5	7527265-7525095
AJ487483	02L24					chemosensory receptor	5	7701530-7700685
		EL928535, EL930109	45L08			tyrosine 3-monooxygenase protein zeta polypeptide	5	8319622-8325549
EY121457	03C14					cyclin B	5	10309898-10303179
EY122740	07B16			BP938105	15F20	ribosomal protein L13	5	11244488-11240962
EY120102	07B16			BP937987	15F20	poly A binding protein	5	11246556-11251157
				BP937522	15F20		5	11260301-11259831
EY118827	08E06						5	13457745-13457476
EY122012	05J22					mitochondrial electron transfer flavoprotein alpha subunit	5	not mapped in Kaikobase
EY122615	05J22					mitochondrial lipoyltransferase	5	15313573-15311555
		FS438603, FS438604	30J17			ornithine aminotransferase	5	15843439-15846385
EY122445	02I23					prenylated protein tyrosine phosphatase	5	16890078-16892815
EY120057	04D03					protein disulfide-isomerase	5	17085977-17098459
U20135	04D03	AF173392	19M08			elongation factor-1 alpha	5	17108069-17105812
EY121155	02N10					Wnt inhibitory factor 1	5	20599975-20620289
		EL929657	18P11			cytochrome c oxidase subunit Va	5	20651050-20649839
EY122359	14O17, 14P10					trachealess	5	not mapped in Kaikobase
EY119041	33N07					FK506-binding protein	6	2276404-2269243
				AY529118	01F13	cadherin	6	2754174-2711012
EY119514	16A05, 16E18, 38C24, 38J14					mod(mdg4) gene	6	4597067-4596419
EY120247	16A05, 16E18					carboxylesterase	6	4608855-4618871
FJ561484	38C24					scolexin B	6	4690554-4676327
EY118218	02O19, 42F11	EL929861	45H22, 46E17			chorion b-ZIP transcription factor	6	4944906-4939663
		FS438416, FS438417	34C10			ribosomal protein L15	6	4972188-4970748
EY122398	42F11			BP937393	07P20	ATP synthase subunit c	6	5006765-5004955
EY118329	03H01, 16N15						6	5792597-5791263
		FS438661	16C16, 44G15				6	9363154-9375927
		FS438670	27F13				6	15310184-15303394
EY122142	15C01					ras3	6	15829362-15827186
EY122587	04N21					beaten path II	6	16017498-16028356
EY119520	03D16					pyruvate dehydrogenase E1 component beta subunit	6	18240885-18236219
		AB568279	25E09			attacin	6	18597848-18596848
EY120921	24N01					serine protease inhibitor	7	7218155-7231593
EY122388	11M04						7	7651790-7648208
		FS438873	43J18				7	not mapped in Kaikobase
		EL929978	43J18	BP937300	28I15	ribosomal protein S27	7	8033476-8032805
EY119503	22O16, 55B24	EL929659	31O15			ribonuclease L inhibitor	7	8627529-8615822
EY120072	22O16, 55B24					annexin	7	8643028-8632391
EY119749	38K24					hemocyte protease	7	9067985-9077878
EY122685	16P10					mannose-1-phosphate guanyltransferase beta	7	9169104-9169941
				GQ221939	29G05	glutamate-gated chloride channel	7	14719909-14740500
		AB568465	96F05			kinesin-like protein	7	14942208-14947714
				FJ613480	41J02	chitinase	7	not mapped in Kaikobase
EY118394	16K16					death-associated LIM only protein	8	858993-849974
		U04223-U04226	31C07			alpha-amylase	8	6465963-6461138
EY119798	25C05					ADP-ribosylation factor	8	10397411-10388947
		EL929414	22H21				8	11119712-11121329
EY120714	34O19					enolase	8	11724917-11734127
		FS438656,FS438657	01C19, 27H14	BP937420	22J05		8	12605178-12604975
				AB180435	17B19	ribosomal protein L27	8	16586229-16584366
EY121815	16B17					transformer-2	8	17182240-17192392
		EL928394	25I09	BP937693	17M03	NADH-ubiquinone oxidoreductase	8	17553151-17552473 (5'-region is incorrectly localized to Chr.12)
EY122015	26K20, 32M14					transmembrane protein 222	8	18362091-18363370
				X97878, AY564237	17N04	aminopeptidase N	9	1064316-1043764
AX247467	24C20					inorganic pyrophosphatase	9	3533262-3533002
		EL929964	23M14			peptidoglycan-recognition protein 2	9	3543941-3540382
EY122571	17K11	EU532439	48I03	AB180446	07E19	ribosomal protein L24	9	7899229-7900076
				BP937736	14J23	H+ transporting ATP synthase beta subunit isoform 1	9	7936722-7938429
		EL928586	33H06			cytosolic aldehyde dehydrogenase	9	12858298-12860317
EY120451	05H17					synaptic vesicle protein SV2	9	13603267-13600271
EY121802	14G02	EL928482	20E20			proliferation-associated 2G4 protein	9	14493293-14496112
				AB180670	23N18, 23P06	ribosomal protein S14	9	14971324-14969964
		FS438967	71J02				9	15114383-15112576
EY117439	10K11					pyruvate kinase	9	15495823-15509388
		EL929443	96F05				9	17253191-17254105
EY118088	20O08					heat shock cognate 70 protein	9	17635253-17631867
EY122126	20O08					vacuolar ATPase subunit a	9	17679685-17681536
EY118427	04A20, 04B07					moesin	9	17876426-17877242
EY122195	01N08					ribonucleoprotein	10	3259282-3244166
		DQ097777	28G12			dopamine transporter	10	3740823-3711549
		AB568290	32G17			laccase 2	10	4778344-4841719
EY122101	05I01					cytosolic juvenile hormone binding protein 36 kDa subunit	10	5231219-5225097
EY119745	07A17					elongation factor Tu	10	4970340-4971164
EY121141	01N20	EL929324	34P23			Bax inhibitor-1 (BI-1)	10	7885629-7883134
Y09009	08N04			EF417852	28P21	ecdysone receptor	10	5971195-6001584
		AB568281	43K08, 43N10	BP937611, BP937766	29O19	ribosomal protein L23A	10	8685325-8679748
EY117879	14F24					GTP binding protein	10	11925698-11936666
EY118706	23A17					annexin B	10	14863357-14884530
EY121202	03A19	FS438671	02F19			X box binding protein-1	10	16299270-16298030
				BP937412	17O14	diapause bioclock protein	10	17021383-17019685
EY120912	15M04					syndecan binding protein	10	not mapped in Kaikobase
EY118212	03I16					beta-1,4-mannosyltransferase	11	6284936-6284433
EY120156	03I16					alcohol dehydrogenase	11	6291845-6294504
		EL928550	03A24				11	6321704-6320023
		FS438626	77G08			CDK5 regulatory subunit associated protein	11	6658604-6655918
				GU947650	45F02	ATP synthase subunit d	11	6741877-6743537
		FS438397, FS438398	43F12	AB180425	25J14	ribosomal protein S28	11	7210655-7209925
EY121096	28K01	FS438457, FS438458	45E13			beta-1,3-glucan recognition protein	11	8143711-8157423
		AB568282	27P20	BP937618	09K20	NADH-ubiquinone reductase	11	8226154-8222139
		EL928699	17M09	AB180448	15F07	ribosomal protein L18	11	9399562-9401190
EY120701	12D02, 28P06					protein disulfide isomerase	11	10545890-10548019
		EL929485	30P24			3-2trans-enoyl-CoA isomerase	11	10547927-10549115
				BP938153	19D08	protein disulfide isomerase	11	10600097-10583142
		EL928390	32A21				11	12982416-12981864
		EL930062	06A11,17G14			gamma-glutamyl hydrolase	11	13118702-13120139
				BP937512	15H12	DEAD box polypeptide 5 isoform 1	11	13959229-13962966
EY119508	26H16	FS438414, FS438415	26B03			ribosomal protein L14	11	14984367-14984789
EY117442	16M15	AB568464	16C24			suppressor of profilin 2	11	not mapped in Kaikobase
U50551	40F06	AB568283	39O14	BP937175	39M09	lysozyme	12	3312581-3308427
EY119584	16B20					P109	12	5008980-4985878
EY122451	08C22	EL929785	15D10			prolyl 4-hydroxylase alpha subunit	12	7697837-7717670
EY121812	13F18					ribosomal protein L9	12	7920434-7922948
		FS438620	24K14				12	8523865-8523548
		EL929323, EL928958	24C16			H+ transporting ATP synthase delta subunit	12	9138588-9140400
		AF243047	24C16			acyl-CoA delta-9 desaturase	12	12204362-12226092
		EL928959	22M18			cytochrome c oxidase CIIa	12	12393664-12394357
		FS438608	39J12			L-isoaspartyl protein carboxyl methyltransferase	12	incorrectly localized to Chr.25
EY118998	04E17	AB568463	48A18	BP937186	34F22	ribosomal protein S2	13	4706792-4708135
		AB568287	90L10			ring box protein	13	7373115-7371989
EY119744	24O09					transaldolase	13	7786247-7793133
				BP938202	08A12		13	incorrectly localized to Chr. 11
EY118320	05F04			BP937373	19J13, 19L19	small heat shock protein	13	8828195-8835483
		FS438624	02J06			Lim protein	13	9031122-9029302
AJ298149	16A14, 16B02			AB180412	33O12	ribosomal protein L31	13	9474668-9476192
		EL929854	47P22			Tetraspanin 2A	13	13078539-13081505
		FS438427	19G16, 48K13			ribosomal protein L27A	13	14180657-14183398
EY120868	05O16					DNA supercoiling factor	13	16203542-16195020
EY118360	05O16			AB180424	14I07	ribosomal protein L21	13	16216987-16214505
EY122120	14M17					proteasome subunit alpha	14	6719863-6716243
EY122734	17A01						14	9993476-9992066
GR966201	17A01, 52O06	FS438386	48N06	EU818707	41E24	ribosomal protein S16	14	10041944-10046152
		EL928599	17P20, 45G16, 48N06			Serine/Threonine protein kinase	14	10051586-10051044
		FS438494, EL929170	22B14			fibroin L-chain	14	10551204-10537499
		DQ988989	01F10			ribosomal protein S3	14	14116030-14114286
GR969506	55E10					esterase-like protein	14	not mapped in Kaikobase
EY122758	13H13			BP937652	19I04, 19O02		15	366631-366011
EY118476	01A21					heat shock 70 kD protein cognate	15	1591227-1590721
		EL928744	37J04			glycyl-tRNA synthetase	15	1711146-1715509
				AB180672	19O20	ribosomal protein S23	15	1859732-1862279
EY121702	04P11	EL929706	33F04	BP937374, BP937405	09N14	ribosomal protein L7A	15	2912712-2916685
EY118631	06H22			BP937216	27O09, 34I18	eukaryotic translation initiation factor 3 subunit 2 beta	15	5019155-5017684
EY119801	02B20			BP937640	04F15, 04H10	ribosomal protein L5	15	5499357-5494655
EY122768	22A21	EL928745	17L08	BP937151	15E14	ribosomal protein S5	15	7587237-7587644
		EL928885	23J11	AB180407	25L19	ribosomal protein L8	15	9127595-9130334
		EL929880, EL928601	47G22			glutathione S-transferase	15	9385082-9384645
		EL929792	21L07, 23I06				15	13422779-13423081
EY117460	23A16						15	13655531-13654443
EY122260	01M15			AB180415	33B24	ribosomal protein S8	15	13998337-14000447
				AB180436	15H05	ribosomal protein P1	15	14486900-14487505
				BP937236	15H05	ribosomal protein L10A	15	14493497-14491199
EY120188	02I20					ribosomal protein P0	15	16149748-16148852
DQ841706	22G09					prophenoloxidase-1	16	328799-338813
				BP938171	09L16	ribosomal protein L6	16	1245534-1241268
EY119255	37M03					fructose 1,6-bisphosphate aldolase	16	4037648-4020320
		GQ844877	07H10	AB263117	07H18	Or83b homologue	16	4359199-4348221
EY122332	33I05					eukaryotic translation initiation factor 3 subunit 8	16	5560399-5567140
EY121451	17L18					myosin light polypeptide 9	16	6393553-6388887
EY117728	14P01					cdc2	16	9797317-9802361
				AB180444	04J06	ribosomal protein P2	16	12100000-12103043
		EL929838	24F10, 31G09			phosphatidylethanolamine binding protein	16	12311195-12304349
		EL929540	24F10			phosphatidylethanolamine binding protein isoform 1	16	12491599-12490079
EY118414	08A05					tyrosine 3-monooxygenase/tryptophan 5-monooxygenase activation protein epsilon polypeptide	16	15005612-15015998
		EL929643	11P22			ribosomal protein L38	17	502706-500168
		AY821557	14F13	GU321345	08L10	beta-1,3-galactosyltransferase	17	538013-543458
		EL929942	44B02	BP937221	02P22		17	2170653-2170047
AF368030	11I01, 11J13	FS438513-FS438515	41G19			cytoplasmic actin	17	2935238-2938434
EY122498	11I01, 11J13						17	2942412-2942209
EY121779	19O09					signal recognition particle	17	4316551-4324164
EY118870	09P16					eukaryotic translation initiation factor 3 subunit 7	17	4290849-4298832
EY117524	13C08	FS438578	47O23			cathepsin B	17	10421503-10422693
EY120708	19D16, 22M22					eukaryotic translation initiation factor 3 subunit 9	17	13657304-13657552
		FS438418, FS438419	02K07			ribosomal protein L22	17	14155737-14152957
EY122246	11M14					proteasome 26S non-ATPase subunit 4	17	15005612-15015998
		FS438394, FS438395	08G22	AB180429	23O11	ribosomal protein S24	17	16084838-16085408
		AB568274	44J23			ribosome-associated protein SA	17	not mapped in Kaikobase
EY122581	33F22, 33O18					signal recognition particle receptor alpha subunit	18	3191793-3183393
				BP937752	03E20	endopeptidase subunit C8	18	6940324-6938516
EY122186	33E09					butyrate response factor 1	18	8149192-8148673
		AB568280	29L16				18	8510391-8510678
		AB568288	29L16				18	8513866-8515305
				BP937392	01J22, 01L08	26S protease regulatory subunit 6B	18	8561245-8554795
		FS438391	44F09			ribosomal protein S19	18	10411547-10406662
		EL929459	07A24				18	11060951-11067631
		EL929887	45A18			chymotrypsin-like serine protease	18	11061058-11055471
		DQ157184	47E14			calcineurin B	18	12672709-12688019
EY121164	11M10, 11O01, 32J03					vacuolar ATP synthase catalytic subunit A	18	13077975-13065697
AJ251959	18L21					sensory neuron membrane protein-1	18	not mapped in Kaikobase
X96862	05A08			EU163980	11A10	general odorant binding protein 1	19	781249-784907
X96863	05A08			EU754719	13L11, 13O12, 55C12	general odorant binding protein 2	19	900465-902244
X96861	26L01	AF133631	10J12	AB263118	13L11, 13O12, 55C12	pheromone binding protein	19	918008-919071
				AB282640	02K02	serpin	19	2269937-2262802
		EL929195	10C20			Juvenile hormone esterase	19	3162431-3161282
EY122623	03J18	FS438607	26M17			phosphatidylinositol glycan	19	5773265-5770151
AY101512	10A09	FS438482	41K09			chemosensory protein	19	7356113-7357071
				EF186792	10N05	chemosensory protein	19	7396635-7397012
		FS438484	40I04			chemosensory protein	19	7396659-7397021
		AB568284	40I04			chemosensory protein	19	7445809-7445039
EY122021	16O08					DEAD family RNA helicase	19	7629859-7619260
EY120926	19M14	FS438648	22M19			salivary secreted ribonuclease	19	8252258-8253696
		FS438634,EL929465	15J06			vacuolar ATP synthase subunit G	20	254974-258839
EY122155	08P04					ribosome-associated membrane protein 4	20	3242341-3238663
EY121912	11O18					FK506-binding protein	20	4287541-4288337
EY122192	12D19, 32C02					enoyl-CoA hydratase/isomerase	20	4757176-4758286
				AB180451	08D02, 22N09	ribosomal protein L7	20	5002210-4998503
				AB180426	08D02, 22N09	ribosomal protein S12	20	5015009-5011040
				AB180420	10A11, 22E23	ribosomal protein S7	20	5819521-5815810
		DQ097796	28G23			octopamine transporter protein	20	6644733-6642210
EY122087	17B17					eukaryotic translation initiation factor 2 alpha subunit	20	7115385-7111107
		FS438653	48G03			ovary C/EBPg transcription factor	20	7637346-7639363
GR966210	54B09					cytochrome c oxidase polypeptide Vb	20	9912801-9916057
EY121220	19D11					vitellogenin receptor	20	10660070-10644752
		EL929388	30F13			ribosomal protein S20	20	13290369-13287099
EY121157	12I05					sorbitol dehydrogenase	21	1664236-1677712
AF096878	33M09					nicotinic acetylcholine receptor alpha-2 subunit	21	3490777-3469354
		EL928438	11O13			ribosomal protein L17	21	4101124-4097038
				AB180423	01M04	ribosomal protein S17	21	6330515-6328769
		EL928874	27F01				21	6421600-6421442
		FS438382	39K23			ribosomal protein S15	21	6721368-6718236
		FS438483	42G10			chemosensory protein	21	6894584-6893782
		EL929444	25F19	BP937875	31A21	ribosomal protein S6	21	6948596-6952257
AF072493	36G11			AB265177	02I18	voltage-gated sodium channel alpha subunit	21	11442968-11473891
EY121086	23G23					CCT-gamma protein	21	12841988-12836107
		AB568285	26L18			fructose-1,6-bisphosphatase	21	13054984-13044464
		EL929499	26L18	AB189025	11K13	tropomyosin 1	21	13128805-13140399
EY122045	16G07			BP937794	13O09	beta-ureidopropionase	21	13386854-13387594
		FS438436	18J17, 25O11	AB180419	15E21	ribosomal protein L36A	21	incorrectly localized to Chr.1
EY119298	11N16					calreticulin	22	4686951-4685552
EY122226	53B09	EL929341	31E15	AB180422	14I14	ribosomal protein L37	22	8728591-8726886
AY172671	08P21					prothoracicotropic hormone	22	10389791-10392060
		FS438527	39G01			cytochrome C1 heme lyase	22	13819667-13820315
				AB189029	02C18, 22N03	serpin	22	not mapped in Kaikobase
EY120734	04F17			BP937967	10M05	calmodulin	23	171572-204851
GR961348	10J18						23	348015-353377
EY121800	07L20	GH995651	73B10	AB189024	06F12	Cu/Zn superoxide dismutase	23	362996-359092
X95606	09M23					octopamine receptor	23	4379779-4465517
		EL929165	35N15			mitochondrial phosphoenolpyruvate carboxykinase isoform 1	23	8776467-8770618
		FS438614	04E08			inhibitor of apoptosis protein	23	9453172-9460526
				AB180445	09C19	ribosomal protein L18A	23	10630980-10627607
		FS438619	25M12				23	11155444-11160627
		FS438672	26B09, 26F05, 46D23				23	12123813-12113865
		FS438399	39H14	BP937184	07J22, 17L14	ribosomal protein S30	23	12465940-12462068
EY121788	11D23	EL929158	29L07			short/branched chain acyl-Coenzyme A dehydrogenase	23	15066258-15082587
EY118930	11D23					Bm44	23	15055267-15051529
U48594	03H19	AB568289	11L24			sex-specific storage-protein	23	16910042-16906460
EY118312	07M17			BP937448	22J24	fibroinase precursor	23	17010668-17020602
EY117529	37A24					cathepsin D	23	17064070-17071002
AJ748335	09G16					olfactory receptor	23	18752593-18645601
GR968654	02F04					small nuclear ribonucleoprotein	23	21738052-21737768
EY122387	07O15						24	2084060-2089078
EY119869	13J21			BP937174	28I05	actin-depolymerizing factor 1	24	7155448-7171578
EY117581	25P23	FS438533	48K23			ferritin	24	13271278-13257578
EY121429	42O15	EL928585	48L15			ADP/ATP translocase	24	15066749-15067755
		FS438567, FS438568	11L08			Sui1 protein	24	16082543-16081322
EY122420	20M15						24	18300848-18300159
		EL928863	29O13, 40L12	AB180441	15K08	ribosomal protein L32	24	not mapped in Kaikobase
		GH992608	48L15				24	not mapped in Kaikobase
				BP937659	07B20	eukaryotic translation initiation factor 4AIII	25	4334177-4337757
EY121943	32B22	EL929251	41H16	BP938018	28N02	transport protein SEC13	25	4438136-4436797
EY117785	32B22					ras-related GTP-binding protein	25	4448940-4440341
		EL928892	06O11				25	5090261-5094426
				BP938159	22J03	ribosomal protein S25	25	6347516-6349778
				AB180417	33H18	ribosomal protein S29	25	6470500-6471772
EY122545	18E20						25	7499344-7498558
EY120570	03C17					26S protease regulatory subunit 4	25	6443567-6445768
		EL929152	29C15	EU137131	14J22	single domain major allergen protein	25	9111358-9111660
AJ748325	24E06					olfactory receptor	25	11124259-11119310
EY121992	19I03					rad51	25	12204975-12201559
EY122222	17L02					THO complex 3	26	2003467-2005736
		FS438659, FS438660	34I24				26	3405727-3407063
				BP937745	27J09		26	3431320-3437269
EY118907	04E24	FS438455, FS438456	13A10			C-type lectin	26	5436853-5446645
DD177582	33G08					octopamine receptor	26	7440062-7471334
AJ487478	23O13					chemosensory receptor	26	8491143-8494755
				CS677798, CS678049	14E23， 14G24	vacuolar ATP synthase subunit B	26	9287821-9278981
		FS438445	24J04			cecropin E	26	11357548-11358669
EY122166	38A22					isocitrate dehydrogenase	26	not mapped in Kaikobase
		AB568467	44B13, 48M16			small heat shock protein	27	8757734-8756986
		EU532466, EU532467	24N11			cubitus interruptus	27	9437542-9438682
				AB325801	14D17	heat shock protein 70	27	12565936-12564588
EY121680	11O13					eukaryotic translation initiation factor 4E-binding protein 2	27	12583569-12582694
EY119051	03G04	EL929806	12B20	AB214972	39H15	90-kDa heat shock protein	27	12584732-12582183
		AB568468	31K24			small heat shock protein	27	not mapped in Kaikobase
				AB282645	39F08	actin 1	28	9944-11074
				BP937293	14N21	testis specific tektin	28	378290-376574
EY120939	28J22						28	628402-628779
EY117929	42L24					vacuolar ATPase subunit C	28	1007206-1028371
EY122528	10B02					H+ transporting ATP synthase gamma subunit	28	1031967-1036759
EY120304	21J02					6-phosphogluconolactonase	28	1763761-1761910
		FS438628	35H16			heme oxygenase	28	3170259-3172825
		AB568286	46J01				28	6926096-6926971
AF379640	36D24	EL929874	06A18			ribosomal protein S11	28	8034421-8039371
		FS438650	16I16			vitellin-degrading protease precursor	28	10687370-10679113
EY121669	08G17					NSFL1 cofactor p47	28	not mapped in Kaikobase

## Sheet: Table S3
Table S3. Polymorphic STS primers of Bombyx mori orthologous genes newly designed for these experiment
H. virescens		O. nubilalis		P. xylostella		B. mori		Forward primer sequence	Reverse primer sequence	Product Size (bp)
Gene	EST	Gene	EST	Gene	EST	Gene	EST
AJ487481						AB186505		CACAATAGAGAAATACTGCT	TAATGAGGACAAAGACTGAG	481
	EY120882				BP938135			GGATAGACCACGGAAACG	CAAGGAACAAGAGAAGAT	1024
	GR959509		FS438530				AV400324	TCGTTACCACATTTCTACCC	TTCTTCCTTCCCTTCCTTAT	733
	EY118432-EY118434						BP116331	GAACAAGAACAGAATCCTC	AGTAAAGTGGTGGTCAAGT	578
			FS438642			DQ443368		CTCCCAAATCCAACAATGC	TGACTGATGCTACTGCTGA	670
AF368031	EY120123-EY120142		EL929889	AB189027		DQ311399		CCGTAGGTTTCGTGTTCT	TTGTTTTCGTCTCTGGTC	492
AY172682			FS438570,EL928587					AAAGACAACCATTCAAGCA	CAAGCCACCCAGACTACCA	465
			FS438678					TAACGGCGAGATAGAGGTA	TGTAATAGGGAATGCTGTG	849
	EY119524,EY119525		GH996474			DQ443129		CATTGCCCCCATCTGTTAG	CCACCACCACCTCTGAAAA	588
					BP937594	DQ311155		CGTAAGTGAAGCGATAACAA	GCGTGAATAGCGATAGTAGC	394
	GR960802		EL929171					CTACAAACAAGCCGAGAGC	CGTTCAGACCCCCTACAGT	397
AJ748332						AB234355		CTTCATCGTAGTTCTGTTCG	GGTTTGTGGTGGTGCTCCTC	734
			FS438603,FS438604					ACAATAGCACACATCAGTCC	AGTCCACATTTAGGTTACAA	349
			EL929859			DQ517934		CCGTGTACTGTGATTGGTG	GTGTGTAAGTGCGTGTCTG	146
AF143847				GU207835		EU082082		GCAATGGTAGTGGACAGG	CGCTATTATCGTGAACAA	773
	EY118941-EY118943						CK534740	TCTGATTCTAAGCCTGTTC	CTGGGTAGCGGGGTTTGAT	408
	GR961165		EL928805		BP937542			GTGGTGGTGGTGGTGGTTC	AGTTGTTCCTTTTGCTGTC	874
	EY122614		EL930010		BP937256	DQ443227		GACTGTTTGCCTTTTCCAT	CCTTGCGTCCTTCATTTGT	530
	EY118820-EY118827						BP123138	GCTGCTTACAAAACTACGA	AACAACATCCTTCCCAACT	681
	EY122012						BB985833,BB991255	TCAACAAACTTCCCTCCAT	GTCTTATAGTCGCCCTCAG	367
			FS438551					AGTTGTCGTAGTCCGTGTC	AGTTGTCGTAGTCCGTGTC	728
	EY120232-EY120261					DQ443247		CCGCCATTCCACCCCATAAG	AGAGAACAATACAAAGACGA	567
				GQ221939				CCCAGGAGACGATGACGA	AACAGCAAGACTAATACC	675
	EY122388							TTTCGTTTTGTTTGACTACCT	TTTGTTTTTCTTCTATTGTGC	927
	EY121907		EL928394		BP937693	DQ443383		CTTTCGGTGGTCTATTACGG	AAGTGGCTATCTACAGTCAA	711
	EY120711-EY120716					EF121427		TTAGCGTTAGCAATAGAAGT	ATCATCAGCCCACAGAAAT	337
		DQ097786				DQ097778		GCAGTAAGGTATCAGGAAT	AAACAACGCTCGGTAGTGG	814
	EY119790-EY119799		EL929590		BP937515	DQ311145		AGTGTAGACTTGACGGATGA	GTGGTCTGATTTTGTCTTGG	616
			FS438656,FS438657		BP937420		BP182694	CGTTTCCGTTGTGATTTC	AGTCTTCTTGTTGTGCTC	243
			EL928586					AATGTGGAATGAATGATAC	TCTGGACTGGACCGAAAAT	407
	EY118420-EY118427						AV403875	AGGGTAGATGGATTTGTGCT	GCCGTCTCTTTAGTTTCGTC	304
			FS438967					ACCACTGCTTGCCTCCTCTT	TATGTCTGTCTGTTTGTTCC	387
			EL929443					GAGATAGCCGAATGGTAA	ACGAAGCAGTTGGTGACG	922
			FS438583			DQ985594		AATCGGAGTAAGGAAGCA	GACAGAATGTGGAGAAAA	780
			FS438879					GTATGCGTTGCTTATGAGG	GAGAGGCGTGTGAGTATTA	649
	GR960796						BP181289	ACATTTTCAGTCCCATTCC	CAACTTCAGTAGGCTCAG	527
	EY121195-EY121202						BW997417	GCAAACTCCCTCCTCCAA	CCCCACCACTTCATCTCC	444
	GR970828				BP937936		AU005812	ACCTATTTCTATGAGTGGA	CAGTTGTCGCTTTATCTTCG	429
	EY120901-EY120912					DQ443139		GTCGTTCTATCCGTCTCTG	AGCCCATCTTTTATTTTTG	632
	EY121734						BP126421	CTGAAAAAGGGCGAAGAA	GTAATGGCACCGAAGACG	297
			FS438626				AU002595	CCCCGAACAGATTGAAAAG	CATTAGCAGCCAGCAGTCC	824
	GR961507		GH992371		BP938218	DQ443359		ATTGGACTCTTGGATAAAC	CGTAAACTGGGCTGCTCTC	365
			EL928390,GH995691					TTTTTGTCCACTTCTCCTC	ACGGTCTGCTCTGTTCCTC	330
	GR970491		EL930062					GGTATTCACAAAGTTCTCA	TTAGGTGGCTCTCGTTCTC	590
	EY120078				BP937512,BP937765	DQ443223		ATGTAATCCTCCGACGAA	ATGGCGATAAAACTCAAC	821
			EL928604				AU000883	TACCCAATAAAGCGAATGA	GAAAAACCGATGCCTCCTG	730
			GH987205				BP122664	ATAGCGTAATCGGCAAGA	CAAGAGAAAGGGACCAAC	836
			FS438608			DQ311369		CGTCTCGGTTATCCATCTG	AGTTGTTGTTCCATCCTGT	1043
			EL929854					GCTTCATCTTCTTCTTTCTT	CTGGCATTGTGTTGGCATCT	623
	EY117908,EY117909						DC543817	TCTTTGATGAATGTGTGA	TGCTTGAATCTTGCGTAT	721
	GR966686						BP177638	CACAACTGATGACGCAATA	CAAATACTTCTTCGCAAAA	946
			GH994084				BP125295	ATGAATGAGCAAGAACAAGG	CTATCCGACCCCAAGTATG	419
	EY122106							ACAATGTAATGAGTGGAA	TATGAATGCCGTGAAGAC	890
	EY122120						AV398626	TCTTTCGCCGCTACATTA	TTCAACGCTATCAACACC	500
	EY120143-EY120145						AV400343	TTCGCATACACTTTTAGGC	TTCTTTCACACAGGACCAA	315
	GR970774					DQ443367		TATTGGACTTTTTCTTTTAC	TTTTCAGCGAGGACTACTAT	586
			EL929792					GCCGAATAGACCACGAAACT	CGACCACAGAGATAGAGAAA	483
			EL929838					AAACAAGATAAGAAGGTGA	GACGAGAAAAGGCTAACGA	785
	GR965185						BP115001	GTGGACTGTAGAAGAAACC	CGGACAAATAGGGGAAACG	750
			EL928629				BP115951	TGAACTACGGAACAGGAGA	ACAACAATAAAATAAGACCA	494
			EL929592				BP181923	AGGTGTCCAGGTGTAGGTC	TCTTCGTTTTGAGCCATTG	626
	EY118410-EY118414					DQ443318		ATGCCGATTGCGTAGTGAA	TGAGGAAGTATTTATTGAGC	495
	EY118485,EY118486						CK534721	CGTGTCGTAAACTCTCCTC	TATCTACCGCCGTCTCTCC	299
			FS438401			DQ321287		GAAAGGTGGATGTTGAAGTA	AGATGAAGAGATTGCGAGAA	499
	EY122246					DQ311300		TACCGTTGTATTCGCTTTA	ACAGTTGACTTTCTCCTTC	461
	EY118869,EY118870					DQ645459		AGGTGCTTTCATCTTCATC	TGTAGTTTGTGGCTTTGTG	759
	GR958597		EL929942		BP937221		AU002332	TGGATTATGGCTTGATGGA	CACGCTACTATGGAAAACG	649
			FS438663				BP119892	GCTTATTCTGTTGCGTGATT	GTTTTAGGTCTGTCTCTTGC	601
	GR958919				BP937708	DQ813503		ATGTGTCTGATTCGTTGG	TATGTCCCTTTCGTTGAT	303
					BP937752			TAGGGCTTAGTTGGGAGAC	GAGTGGTATTTGCTGTTGA	424
			EL929887,GH991856			DQ443284		CAGGTTCACTTGGCTCATC	TTCGTTTTGTTTTGTTGTT	204
	EY122610						BP179510	AGATGACAGATGCCCCGTAGT	AGTAGGATTGATGACCAGATG	726
	EY121164-EY121166					EF114391		AGCGTATTTTGTTAGTTTT	GGTGCTGGAGACGGAGTT	489
	EY122581					DQ646416		ATTTAGGATAGATGGACTC	CGAAAACAAAGAAGGAAC	604
			EL929488,GH995019			DQ443213		GACCTCCTCATTTTGTTG	TTAGCCGCACCATTATCT	657
	EY120291-EY120295					DQ311340		ACCGCCACCTTTGACACCT	TTGCCTAATGCTGCTACCC	426
			EL929195					TACGACTCTGGACGAACTT	CAGCAAAATCAAATACGAA	294
	EY120922-EY120926					DQ443141		ACAGCAAAAATAACAACTCC	AGGCAATGACTCTCGTGAT	353
			FS438634,EL929465			DQ311429		CATACACCAGATTCAAGACG	CGATGCCGAGACCAAAGTTA	298
		AY513651			BP937338	AB065132		CTGTCTGTCCGTTAGTGTC	CTTATCTGTGTGGGCTTAT	685
			GH994780					TTTACTGGCTGCTGCTACA	CACTCTTGGTTTCCGATAC	611
	EY122192				BW997539			AAGATAATCAAGCCAAAGT	TGCCTCATAAAAGAAAAAG	625
	EY122055							TCCAAAAACTTCTGCTGTG	CCCGTAATGATGATGTCCT	830
AF096878						EU143793		GCCACAAATCCCCAGTCTT	ATTACCATTTTTCTTCTTAC	699
			GH995597			GU322819		ACACGAAACAATGAAGTCT	GTAATAACAAGCACCAACA	776
AF072493								CTACAAACGGAATAATAAATGG	ATAAAGACAAGAAACTCAAAGA	577
			FS438436,EL929791	AB180419		AY769306		AATGGAGTGTTTTTATGCT	ATGAGAAGAGGGCTATGGAG	407
			FS438483			DQ855522		CACAGTAAGGCAAAAACAA	TTGCTGGAGAAAATGGTAT	582
	EY121672-EY121674						AU004975	AGACGAAGGGCAAGACGAG	AAGGCTAATGTAACGGAAAA	372
	EY121086,EY121087						AU005469	GTGACTGATGTGCTGCTTTA	GGTTGTTGTCCGTTTTAC	564
			EL929499,GH989763	AB189025		DQ443312		CTGTCCGCTTGTGCTCCTAAT	GCTCTTGTATCTATCCTTGTT	640
						D00738		GTTTTTGTGTTGGGTATCC	AGTCGTGGCTTTGTTGCTA	531
	EY122467							CGATGTATTGCCGATTTC	TCCTGTGTGCTATTCCTC	712
			EL929392,EL929920				AU001912	TTGTATTTGTTTGCTCTTG	ATGGAATCTCTGCCTCGTG	643
	EY120731-EY120734				BP937967	DQ311341		TCACACCGATTACAGAAGAA	TAGGACAGAACCCCACAGAA	731
AJ748335						AB234358		TTTATGGGTATTAGAGACTG	TCGTATTGTGTTGTTGAGGT	538
	GR970325		FS438489,GH988983		BP937491		BP124571	AAGGGTCTTGTTTTCAGTTA	ACGGTAGCAGTAGGCACGAT	776
			GH989302				CK559910	CGTTTTGGATACAGTCAC	TTCATTCATCGGTCTTCG	528
	GR959959		FS438887				AV405549	ATGATGTTCCCTCTGTGTGG	TCGCTCGCTCGCTCCGTGTA	671
AF009345								CACAATAGTTCCCAATCCT	CCACGAGACCAGCAATACC	869
	EY119741,EY119742						AU002677	AGCCTGGAAGATGGATAGA	GGGACCTCACGCCTCAAGT	756
	EY118409					DQ443390		GTCATCGGGCAGGCAACAT	TGGAGGCGGCTAAGGTAAT	715
	EY118209-EY118211				BP937659	DQ667967		CACGGCTGAAAATGAAAAGT	CAGTTGAACGAGAAGAATGG	796
	GR969892						BP184315	ATAAATGCCACCACCTACTG	TCACTAAACTCTCCAAACCA	458
	EY121943		EL929251		BP938018		CN374568	CGATAATAAAGGACAAGGT	GAATACACTGGACACGAAA	567
AJ748325						AB234351		AACTGGAGATTATTATGG	ATTACCTCACTACACTTTG	565
	EY117784,EY117785					DQ525203		TGTCTACGATGTTACGAATG	AGTCTTTTGCTGATGTCTCC	636
	EY122545		EL928838,FS438594				AU004516	CGGAGGCAGCACTAACAAT	TCAGGACAAACGCATCAAG	588
	EY118907-EY118927						BY932031	AAGGTCGTTGAATAGAGC	TTAGTTGTGAAGTCGTGA	876
	EY121809						BW999032	TGATGTGTTCTTGATGAG	ACTTATTTTGTCTACTGC	573
					BP937745			ACACATTTCGTCTTCTCG	TGTCTTCACCTCCGTCAA	848
S61797			GH994287		CS677798,CS678049	EF107513		CCGAGGACTTCTTGGACATC	GACTTTTATTAGGTTTCATC	582
			FS438659,FS438660				BJ985459	GCCAACACAGAGGATTAGG	TGAAAACAGAAGAGGATGA	551
	EY122658					DQ443134		CAATGAATGCCTGAAAGC	CTGGTGGTAATGGTAGAA	721
			EL928892					GCTAACGGACGATTGACTG	GTAACTTTGACCACCATTG	380
			FS438455,FS438456			AJ011573		GGTATCCTCCTTCTGCTGA	GTTGCTATGGCTTCTTGTG	474
			GH997437			DQ443134		CAATGAATGCCTGAAAGC	CTGGTGGTAATGGTAGAA	721
	EY120299-EY120301							TGATGGGGTTGTGATGTC	ATTGGCGTTTCTTTTCGT	554
	EY120313,EY120314						CK514730	ACTCTTCATTTCCGTTGC	GTCAGTTGTGCGTCTTCC	442
			FS438424					TTCACTTCACACAAATACC	TTCCTACCATAACTTCCAC	401
			FS438628			DQ443164		TTACCTTTCATTCTCATTGGA	GTCACTCTGCCTTCTTTTTCT	575
	EY120304-EY120306					EF198104		TAACAGATTCCCCAAAACC	TGATGAGTGATACCAACAG	691
	EY120939							ATCTCCTGATTTTCTTCGTT	TGATATGTCACTGTTCTCTA	332
			AB568286			GQ338156		CATTTGGTTGTTTTTCTCA	CATTTTCGTTTCGTTCGTT	936
	EY121668,EY121669						BP184133	CTGCGAATAGAGAAGATACA	ATGCCTGACCTGGAATAAAG	1047
			GH999355				BP122665	CCTCCTGCTTCCTGCTTCTG	TCTTGTGACATCTAACTTGA	644

## Sheet: Table S2
Table S2 Sequences of degenerate primers used for cloning of Ostrinia nubilalis genes
Gene		Forward primer sequence	Reverse primer sequence	Obtained sequences
Single-step PCR
ribosome-associated protein SA		ATHGARAAYCCNGCNGAYGTNTTTGT	GANGCYTCNGTDATNGGYTGRTGATC	AB568274
nuclear receptor FTZ−F1		GAYCAYTTYAAYGARYTNCARAAYAA	TTNCKYTTNGCRTGNARCATYTCCAT	AB568488
invected		GAYGARAARAGNCCNAGNACNGCNTTTC	GTYCTRTGRTTRTTRTANAGNCCYTGNGCCAT	AB568275
ribosomal protein P0		AARAGYTTYATHGTNGGNGCNGAYAATGT	GCYTGRAARAANGANGTYTTTTC	AB568276
heat shock cognate protein		ACNAARATGAARGARACNGCNGAAGC	GTDATNGTDATYTTRTTYTCYTTATT	AB568277
ribosomal protein S7		GARAARAARTTYAGYGGNAARCATGT	TGYTCDATNGTNGTYTGYTGRTTYTTATC	AB568278
small heat shock protein		CARRTNAAYHTNGAYGTNCA	TCYTTNAYYTSYTTNYKNAC	AB568467, AB568468
Nested PCR
cGMP-dependent protein kinase	1st	TGYTTYCARACNATHATGATG	TCRAACCAYTTRTGYTTYTG	AB568466
	2nd	AARWSNGTNCCNATHTTYAA	TARTCNGCNSWDATRTCRTG
kinesin-like protein	1st	WSNAARAARTTYACNTTYGA	GTNARYTTNSWYTCNCKRTA	AB568465
	2nd	AAYTGYACNGTNTTYGCNTA	ARNARNSWYTGRTTDATRTT
ribosomal protein S2	1st	GGNTTYMGNGGNGGNTTYGG	TANGCRTANGTYTTNGCDAT	AB568463
	2nd	AARGARGAYCARAARGARTG	TANGTNGCYTTNGCRAARTT
suppressor of profilin 2	1st	TGYCAYGCNTGGAAYAARGA	CADATNACNARYTGNCCRTC	AB568464
	2nd	GNGTNATGGGNATHGAYTGG	GYRTTYTGRTGDATNSWNTC
troponin I	1st	GARGTNMGNAARMGNATGGA	CCARTCNGGYTTYTTYTCYTT	AB568462
	2nd	GCNAARAARGGNTTYATGAC	TTNGCRAAYTTRTTYTCRTA
